# 1 **A unicellular walker embodies a finite state machine**

2 Authors: Ben T. Larson<sup>1</sup>, Jack Garbus<sup>2</sup>, Jordan B. Pollack<sup>2</sup>, and Wallace F. Marshall<sup>1</sup>

3 <sup>1</sup> Department of Biochemistry and Biophysics, University of California, San Francisco,  
4 California, USA

5 <sup>2</sup> Computer Science Department, Brandeis University, Waltham, Massachusetts, USA

6

7 **Cells are complex biochemical systems whose behavior emerges from interactions**  
8 **among myriad molecular components. The idea that cells execute computational processes**  
9 **is often invoked as a general framework for understanding cellular complexity. However,**  
10 **the manner in which cells might embody computational processes in a way that the**  
11 **powerful theories of computation, such as finite state machine models, could be**  
12 **productively applied, remains to be seen. Here we demonstrate finite state machine-like**  
13 **processing embodied in cells, using the walking behavior of *Euplotes eurystomus*, a ciliate**  
14 **that walks across surfaces using fourteen motile appendages called cirri. We found that**  
15 **cellular walking entails a discrete set of gait states. Transitions between these states are**  
16 **highly regulated, with distinct breaking of detailed balance and only a small subset of**  
17 **possible transitions actually observed. The set of observed transitions decomposes into a**  
18 **small group of high-probability unbalanced transitions forming a cycle and a large group**  
19 **of low-probability balanced transitions, thus revealing stereotypy in sequential patterns of**  
20 **state transitions. Taken together these findings implicate a machine-like process. Cirri are**  
21 **connected by microtubule bundles, and we find an association between the involvement of**  
22 **cirri in different state transitions and the pattern of attachment to the microtubule bundle**  
23 **system, suggesting a mechanical basis for the regularity of state transitions. We propose a**  
24 **model where the actively controlled, unbalanced transitions establish strain in certain cirri,**  
25 **the release of which from the substrate causes the cell to advance forward along a linear**

26 **trajectory. This demonstration of a finite state machine embodied in a living cell opens up**  
27 **new links between theoretical computer science and cell biology and may provide a general**  
28 **framework for understanding and predicting cell behavior at a super-molecular level.**

29

## 30 **Introduction**

31 Cells are complex physical systems controlled by networks of signaling molecules.  
32 Single cells can display remarkably sophisticated, seemingly animal-like behaviors<sup>1-3</sup>,  
33 orchestrating active processes far from thermodynamic equilibrium in order to carry out proper  
34 biological functions<sup>4,5</sup>. Indeed, single cells can make decisions by sensing and responding to  
35 diverse cues and signals<sup>6</sup>, execute coordinated movements<sup>7,8</sup> and directed motility<sup>9-12</sup>, and even  
36 solve mazes<sup>13,14</sup> and possibly learn<sup>15-18</sup>. Such behaviors in animals arise from neural activity  
37 and have been studied extensively, but we know comparatively little about the mechanisms of  
38 cellular behavior<sup>19,20</sup>. In individual cells, behaviors emerge directly through the joint action of  
39 chemical reactions<sup>21</sup>, cellular architecture<sup>3</sup>, physical mechanisms and constraints within the cell  
40<sup>22,23</sup> and interactions of the cell with its local environment<sup>24</sup>. The links between information  
41 processing, decision-making, and their physical manifestation as cell state transitions suggest  
42 that cellular behavior might be understood as an embodied computation<sup>25,26</sup>. The theory of  
43 computation has often been invoked as a general framework for understanding cellular dynamics  
44<sup>25,27-32</sup>, with environmental sensing by bacteria being a particularly deeply studied example<sup>32-34</sup>,  
45 and has been used to engineer programmable cell states<sup>35</sup>, but the manner and extent to which  
46 cells might embody functional, computational processes as well as the extent to which a  
47 computational perspective on cellular behavior might prove productive remains to be seen.

48           Among the microbial eukaryotes (protists), ciliates display striking examples of  
49 unicellular behavior including hunting<sup>3</sup>, sensorimotor navigation<sup>10</sup>, and predator avoidance<sup>36</sup>.  
50 Spirotrichous ciliates of the genus *Euplotes* are notable for their complex locomotion<sup>37–39</sup>, using  
51 bundles of specialized cilia called cirri to walk across surfaces<sup>37,38</sup> (Fig. 1a, Movies S1 and S2).  
52 Depending on the species, cells generally have 14 to 15 ventral cirri arranged in a highly  
53 stereotyped pattern used for walking locomotion<sup>40</sup>. *Euplotes* live in aquatic environments, and in  
54 addition to walking, their cirri can be used for swimming and rapid escape responses<sup>41</sup> (Movie  
55 S2). Oral membranelles (Fig. 1b) generate feeding currents to capture bacteria and small  
56 protistan prey and are also used for swimming. Early 20<sup>th</sup> century protistologists were so  
57 impressed by the apparent coordination of cirri that they proposed the existence of a rudimentary  
58 nervous system, the neuromotor apparatus, to account for their observations<sup>39</sup>. This theory was  
59 motivated in part by the presence of intracellular fibers connecting various cirri (Fig. 1C), now  
60 known to be to be tubulin-based structures<sup>42,43</sup>. Although the walking movements of *Euplotes*  
61 are superficially similar to those of animals such as insects, the low Reynolds environment of  
62 aquatic microorganisms, where viscous forces dominate over inertial forces, imposes significant  
63 physical constraints on all movements that do not impinge on the movements of larger terrestrial  
64 animals<sup>44</sup>.

65           How can a single cell coordinate a gait without a nervous system? Coordination, to the  
66 extent that it exists in the gait of *Euplotes*, would require some kind of dynamical coupling  
67 among cirri or between cirri and some shared external influence. Recently, analytical techniques  
68 from statistical physics have been used to characterize, understand, and predict mesoscale  
69 dynamics in biological systems, including cellular behavior<sup>4,5,45,46</sup>. These approaches rely on  
70 coarse-graining the complexity of biological dynamics into states and analyzing the nature of

71 transitions between states. For example, a state representation allows us to ask whether forward  
72 and reverse transitions between pairs of states are equal, a condition known as detailed balance  
73 <sup>4,47</sup>. Systems that violate detailed balance operate in a non-equilibrium mode and can produce  
74 directed cycles in state space <sup>4,48</sup>. Broken detailed balance has been observed in the motility  
75 dynamics of cultured mammalian cells as well as the motility dynamics of a freely behaving  
76 flagellate protist <sup>5,45</sup> and implies that non-equilibrium models are most applicable to such  
77 systems <sup>46</sup>.

78         When information processing drives patterns of state transitions, such a system can be  
79 viewed in terms of automata theory, a fundamental level in the theory of computation <sup>49–</sup>  
80 <sup>51</sup>. Automata theory can be used to address problems of decision-making and control in complex  
81 systems by providing predictive understanding independently of the underlying details of how a  
82 given process is implemented <sup>50</sup>. Inspired by work considering cellular behavior in the context of  
83 the theory of computation <sup>25</sup>, we hypothesized that walking cells might be governed by finite  
84 state automata with directed, processive movement arising from reproducible patterns of state  
85 transitions.

86         The consistent structure of *Euplotes*, its mode of motility, and its ease of observation  
87 makes these cells an ideal biological test-bed in which to apply theories of non-equilibrium  
88 statistical mechanics and embodied computation, both of which rely on describing a system in  
89 terms of discrete state transitions. Here, we use time-lapse microscopy and quantitative analyses  
90 to show that *Euplotes eurytomus* walks with a cyclic stochastic gait displaying broken detailed  
91 balance and exhibiting elements of stereotypy and variability, consistent with a finite state  
92 automaton representation. The observed dynamics are reminiscent of behavioral regulation in  
93 some cells and animals <sup>5,52</sup> but contrast with many well-characterized examples of cellular

94 motility<sup>7,9,10,12,53–56</sup>. Our results provide a clear demonstration of machine-like processes  
95 governing cellular state transitions and serve as a framework for investigating the principles of  
96 behavioral control and non-equilibrium dynamics in single cells.

97

## 98 **Results**

### 99 *Walking dynamics can be described in a reduced state space*

100 In order to ask whether cell behavior is governed by a finite state machine, we analyzed  
101 the walking behavior of *Euplotes eurystomus* cells,<sup>41</sup> focusing on the simplest case of  
102 uninterrupted, linear walking trajectories (Fig. 2a, b, Movie S1). Cells were placed onto  
103 coverslips on which free, spontaneous walking behavior was observed by microscopy. A focal  
104 plane at the cirrus-coverslip interface was chosen in order to clearly observe cirral dynamics  
105 (Fig. 2a). The relative spatial positioning of cirri is highly stereotyped from cell to cell, allowing  
106 us to give each of the 14 cirri an alphabetic label from a-n (Figure 2c). In each video frame (33  
107 frames/s), the walking state of the cell was encoded as a 14-bit binary vector, with each bit  
108 corresponding to a cirrus and receiving a value of “0” if the cirrus was in contact with the  
109 coverslip and stationary and a “1” if the cirrus was in motion (instances of stationary cirri held  
110 above the coverslip for a sustained period of time were not observed). The trajectories of 13 cells  
111 were manually tracked and annotated for a total of 2343 time points. This quantitative analysis  
112 revealed stepping-like cirral dynamics in that cirri tend to undergo rapid movements followed by  
113 longer periods of quiescence (Fig. 2d). Cirral dynamics appeared to lack any obvious patterns  
114 such as periodicity or repeating sequences of states (e.g. Fig. 2d), implying that the state  
115 sequences are either stochastic, or generated by complex deterministic processes. This lack of  
116 periodicity or fixed phase relationships between appendage movements is different from the gaits

117 of most animals or those reported for various flagellates<sup>57-59</sup>. Autocorrelation analysis confirmed  
118 the observed lack of clear periodicity (Fig. S1).

119         Despite the apparent complexity of cirral dynamics, we suspected that discernable  
120 structure might exist, which would allow us to obtain a reduced state space that accurately  
121 described the dynamics as has proved successful in behavioral analysis of diverse living systems  
122<sup>45,46,60-63</sup>. We performed dimensionality reduction using non-negative matrix factorization  
123 (NMF), and cross-validation by imputation<sup>64,65</sup> (see Methods and Fig. S2 for more details)  
124 revealed the cirral states to be well-described in three dimensions (Fig. 2e-g). The components of  
125 the NMF analysis correspond to distinct groups of cirri, and these groups constitute spatially  
126 distinct partitions of cirri with respect to their positions on the cell body (Fig. 3h). The  
127 dimensionality reduction of the gait state space arises at least in part from shared pairwise mutual  
128 information between groups of cirri (Fig. 3i).

129         We next used the density-based spatial clustering of applications with noise (DBSCAN)  
130 algorithm<sup>66</sup> to group our data into clusters in an unbiased fashion, with members of a given  
131 cluster sharing similar patterns of cirral activity. Visual inspection in conjunction with silhouette  
132 coefficient<sup>67</sup> (a metric of cluster cohesion and separation) analysis revealed that 32 clusters  
133 accurately captured the visible structure in the reduced state space without overfitting (Fig. 2e-g,  
134 see Methods and Fig. S3 for more details)\*. These reduced gait states correspond to distinct  
135 patterns of cirral activity (Fig. 2j). Taken together, our results reveal stereotypy in the  
136 spatiotemporal patterns of cirral activity. The discrete, reduced state space, or set of gait states,

---

\* The problem of determining the true number of clusters is an unresolved problem<sup>89</sup>. We have followed standard methods to determine cluster number but have found that our key results do not depend sensitively on the precise number of clusters identified (see SI and Fig. S7).

137 demonstrates that cells make use of a subset of the possible patterns of appendage movement  
138 during walking locomotion.

### 139 *Euplotes walks with a cyclic stochastic gait*

140 In order to relate the gait states identified in our cluster analysis, we asked how changes  
141 in the number of active cirri may relate to cell movement. Naively, one might expect that the  
142 force associated with locomotion is roughly proportional to the number of moving appendages<sup>68</sup>.  
143 Alternatively, we velocity might inversely correlate with the net change in cirral activity, which  
144 would be expected if stationary cirri were generating a pushing traction force as in crawling or  
145 climbing animals<sup>58,69</sup> or if cirri execute a power stroke just before coming to rest as has been  
146 suggested by Erra et al.<sup>38</sup>. At low Reynolds number, velocity should be proportional to the  
147 difference between the net force generated by the cell and the opposing drag<sup>44</sup>. Examining cell  
148 velocity versus the net change in cirral activity, however, showed that neither of these  
149 expectations were in fact the case (Fig. 3a). Cell velocity was only weakly correlated with  
150 number of active cirri ( $R^2=0.03$ ), and instead, small to moderate positive and negative changes in  
151 the number of active cirri corresponded to the largest cell velocities (Fig. 3a). We reasoned that  
152 transitions between gait states must be important to driving the forward progression of walking  
153 cells, and so sought to determine whether this active coordination might manifest in the observed  
154 gait dynamics.

155 Analysis of the 1423 pairwise transitions in our dataset yielded the transition matrix  
156 displayed in Fig. 3b (see Methods for more details). The presence of strongly unbalanced  
157 transitions such as from gait state 3 to 17 versus 17 to 3 suggested broken detailed balance, and  
158 indeed, a number of forward and reverse transitions were found to be significantly unbalanced by  
159 the binomial test (see Methods). Entropy production rate has been used to quantify the degree of

160 broken detailed balance, or, similarly, the distance from equilibrium where the entropy  
161 production rate will be zero<sup>5</sup>. Following the procedure detailed in<sup>5</sup>, we obtain a lower bound  
162 estimate for an entropy production rate of 0.4, similar to the value reported for strongly non-  
163 equilibrium gait transitions observed in a flagellate<sup>5</sup>. Walking *Euplotes* cells, therefore, have a  
164 strongly non-equilibrium gait despite lack of periodicity.

165         Only 322 of the 1024 possible types of transitions were observed to occur at least once,  
166 and within this restricted set, only 173 occurred more than once (Fig. 3c). Also, we found that  
167 relatively few transitions corresponded to substantial cellular movement (Fig. 3c). Crucially, the  
168 presence of broken detailed balance revealed the existence of directed cycles of cirral activity  
169 during locomotion. To get a better understanding of the nature of these cycles, we grouped  
170 transitions into two categories: balanced transitions, which satisfy detailed balance, and  
171 unbalanced transitions, which do not (see Methods for details). This partitioning allowed us to  
172 separately investigate unbalanced, non-equilibrium-like and balanced, equilibrium-like  
173 transitions (Fig. 3d, e). Significantly unbalanced transitions ( $p < 0.05$  by binomial test) are among  
174 the most frequent transitions, but only involve a small number of states (Fig. 3d). Of the 32 gait  
175 states, we found that only states 2, 3, 4, 7, 17, and 27 were associated with unbalanced  
176 transitions. We noted the presence of one complete cycle with unbalanced transitions following  
177  $2 \rightarrow 3 \rightarrow 17 \rightarrow 2$ . We had expected that unbalanced transitions might be associated with a “power  
178 stroke” in the sense of occurring simultaneously with cell movement, but in fact high cellular  
179 velocities tended to be associated with balanced transitions (Fig. 3d, e). Additionally, we found  
180 that, with the exception of transitions between states 1 and 2, transitions occurring at the highest  
181 frequencies were unbalanced (Fig. 3d).



182           Notably, the most frequent balanced transitions were associated with transitions into and  
183 out of gait state 1, a unique “rest state” which involves no cirral movement (Fig. 3c, d).  
184 Furthermore, we found by computing the autocorrelation function for a binarized sequence of  
185 each state that gait state 1 has the most predictable dynamics in terms of significant positive  
186 autocorrelation in contrast to the lack of significant autocorrelation seen for other states (see Fig.  
187 S4). Although transitions between states 1 and 2 are balanced, the most frequent transitions out  
188 of state 2 are strongly biased toward transitions into state 3, from which other strongly biased  
189 transitions also frequently occur, including the cycle of biased transitions mentioned in the  
190 preceding paragraph. The presence of high frequency unbalanced transitions does not preclude  
191 the existence of highly variable trajectories through state space. The picture of walking  
192 trajectories that emerges is of stochastic excursions from gait state 1 into a stochastic cycle  
193 involving a mix of balanced and unbalanced transitions, with the majority of cell movement  
194 occurring during infrequent, equilibrium-like transitions. Biased transitions, occurring at  
195 relatively high frequency from a subset of states, introduce temporal irreversibility to the gait of  
196 *Euplotes* due to their strongly non-equilibrium character.

197           Finally, we checked whether gait state transition dynamics had the Markov property,  
198 which entails that transition probabilities are determined completely by the present state, and that  
199 previous dynamics contribute no additional predictive information<sup>70,71</sup>. Lack of past dependence  
200 has led to Markov processes often being referred to as “memoryless”<sup>72</sup>. When we compared the  
201 gait transition matrix (Fig. 3b) with a computed transition matrix over two timesteps, we  
202 observed these matrices to be different from one another, which is inconsistent with the Markov  
203 property (see Fig. S5). Finally, we applied a Billingsley test, a chi-squared measure for  
204 Markovness<sup>73</sup>, which revealed that the null hypothesis that the process was Markov could be

205 rejected ( $p=0.005$ ). These analyses showed that *Euplotes* retains some “memory” of the prior  
206 sequence of cirral movements during locomotion.

207       Taken together, our analysis revealed a mixture of unbalanced transitions arranged in  
208 cycles and balanced transitions arranged as networks, for which we propose to apply the term  
209 “cyclic stochastic gait”. The cyclic stochastic gait of *Euplotes eury stomus* incorporates elements  
210 of both stereotypy and variability in gait dynamics. Forward progress of the cell is not produced  
211 merely by a physical ratchetting process driven by unpatterned fluctuations in cirral activity, nor  
212 is it produced by a highly regular, deterministic process like a clock. It has been argued that  
213 significant computation arises in physical systems exhibiting such a mix of stereotypy and  
214 variability<sup>49,74,75</sup> in the sense that the time-evolution of the system is most compactly described  
215 by the result of a computation involving state transitions, memory, and decision rules, rather than  
216 by a periodic oscillation or a random coin flip.

217       While our analysis revealed a computational underpinning of gait, we sought to better  
218 understand the functional organization of the dynamical patterns driving processive motion of  
219 the cell. To do so, we first focused on the highest transition probabilities emanating from each  
220 state. Transition probabilities were estimated as  $N_{ij}/N_i$  where  $N_{ij}$  is the number of transitions from  
221 state  $i$  to state  $j$ , and  $N_i$  is the total number of transitions from state  $i$ . This allowed us to prune  
222 away rare transitions in order to reveal the dominant structure of gait state transitions. Figure 3g  
223 displays the pruned transition matrix as a heatmap. We found that relatively few states were the  
224 recipients of the majority of high probability transitions, and many states received none. To more  
225 clearly visualize the structure of transitions, we grouped together all gait states receiving no more  
226 than one unique high probability transition with the idea being that state transitions into this  
227 group show little bias in terms of source state, and within the group, transitions between states

228 exhibit low probability, time unbiased, equilibrium-like fluctuations. the majority of cell  
229 movement was associated with transitions between states within this group. In contrast to the  
230 “cloud” of states linked by low-probability, balanced transitions, nearly all of the states receiving  
231 high probability transitions were either the three “cycle” states, or else fed cycle states with their  
232 highest probability transitions, with the majority feeding gait state 17.

233         Focusing on the structure of transitions in this way allowed us to derive a simplified,  
234 functional representation of stereotypy in gait dynamics as depicted in Fig. 3h. Although gait  
235 state 1 is not the recipient of any individual high probability transitions, we identified it as the  
236 unique “start” state from which cells initiate walking. Beginning with this start state, cells  
237 transition with high probability to gait state 2, also one of the highest frequency transitions and  
238 the first state in the  $2 \rightarrow 3 \rightarrow 17 \rightarrow 2$  cycle of unbalanced transitions. From this first cycle state,  
239 cells transition to gait state 3, the second cycle state, with highest probability and frequency and  
240 then similarly on to gait state 17, the third cycle state. This sequence from the start state through  
241 the cycle states corresponds to increasing amounts of cirral activity. Although the highest  
242 probability transitions from the third cycle state to any single gait state return to the first and  
243 second cycle state with equal probability and return to the first cycle state also being unbalanced,  
244 cells in fact transition to the equilibrium “cloud” of motility-associated states with overall higher  
245 probability. Return to the cycle states tend to occur through various moderately high probability  
246 transitions from the motility state cloud or through intermediate states. In conjunction with this  
247 set of transitions, we also noted unbalanced transitions stemming from the cycle states to the  
248 motility state as well as intermediate state subsequently feeding the next cycle state.

249         Altogether, the picture that emerges of stereotypical gait dynamics is of biased transitions  
250 through cycle states before relatively low probability, unbiased transitions associated with

251 substantial cell movement before returning to the start or cycle states and beginning the sequence  
252 again. While this general sequence is repeated during walking, there is variability or apparent  
253 stochasticity in the details of gait state transitions with increasingly variable transitions as any  
254 given sequence progresses. We propose that the cycle states serve to establish configurations of  
255 cirri necessary for cells to later transition to between states from which forward progress of the  
256 cell is generated. Many state transitions along any instance of the stereotyped sequence are  
257 unbiased, but biased, high probability transitions, presumably resulting from active cellular  
258 control, give temporal irreversibility to the sequence.

259

### 260 ***The fiber system of *Euplotes* constrains models of gait coordination***

261         What physical machinery could embody this information processing required to generate  
262 the stochastic cyclic state transitions seen during *Euplotes*' walking? We reasoned that there  
263 must be some form of coupling or communication between cirri or feedback between gait state  
264 and cirral dynamics. The role of the system of cytoskeletal fibers associated with cirri as conduits  
265 of information between cirri during cellular locomotion, supported by microsurgical  
266 experiments, has been a key hypothesized mechanism of gait coordination since the early 1900s  
267 <sup>76,77</sup>. We wondered whether the structure of the cytoskeletal fiber system associated with cirri  
268 (Fig. 4a) could give some insight into how cirri might be coordinated.

269         We sought to characterize and reconstruct in 3D the tubulin-based fiber system of  
270 *Euplotes* associated with cirri and lying just beneath the cell cortex <sup>39,42,43</sup>. Upon inspection of  
271 our confocal reconstructions of SiR-tubulin labeled cells (Fig. 4a, Fig. S6), we noted the  
272 presence of two morphologically distinct classes of fibers, one thicker, linear class and the other  
273 more filamentous and less linear, consistent with previous observations (Fig. 1c, <sup>39,42,43</sup>).

274 Additionally, we observed a group of thick linear fibers associated with some of the frontal cirri,  
275 which to our knowledge has not been previously reported. Fibers emanate from the base of all  
276 cirri, appear to intersect one another, and also connect to the cortex of the cell at various points  
277 (Fig. 3g). Some cirri were found to be associated with only thick fibers while others have both or  
278 only thin fibers. Based on apparent fiber intersections and convergences, we found the fiber  
279 system to constitute a continuous network between all cirri, with the fibers associated with the  
280 base of each cirrus intersecting the fiber system associated with at least one other cirrus (Fig. 4a,  
281 b). Contrary to the long-standing hypothesis from the literature<sup>76</sup>, the functional  
282 modules (groups of co-varying cirri) identified in our dynamical analysis were not exclusively  
283 linked by dense fiber intersections<sup>39,43,76</sup> (Fig. 4a, b). In fact, connections between cirri are not  
284 generally associated with any statistically significant difference in mutual information (defined  
285 in terms of the information that the activation state of one cirrus has concerning the other)  
286 compared to unlinked pairs of cirri ( $p=0.14$  by Wilcoxon rank sum test, Fig. 4C). However,  
287 information flow became apparent when fiber-fiber links are grouped by type (i.e. thick to thick  
288 fiber, thick to thin fiber, or thin to thin fiber). We found that pairs of cirri associated with only  
289 thick fiber to thick fiber and only thin fiber to thin fiber links have increased mutual information  
290 compared to those without links (Fig. S6). Interestingly, we found that cirri nearby one another  
291 and connected by fibers to similar regions of the cell cortex shared the most mutual information  
292 (Fig. 2i, 3c, 4d, e), suggesting that if the fibers play a role in cirral coordination, coupling may  
293 also be mediated by mechanisms at the cirrus and fiber-cortex interface. Cirri d, e, h, i, for  
294 example, share very little mutual information with any of the other cirri, and fibers emanating  
295 from the base of these cirri contact the cell cortex and other fibers at various unique points. Cirri  
296 g and f, on the other hand, which share more mutual information than any other pair, are

297 associated with both thick and thin fibers terminating at similar regions of the cell cortex. Indeed,  
298 both distances between pairs of cirri and cross nearest neighbor distance (a measure of similarity  
299 between discrete spatial distributions) between paired sets of cirrus-cortex contact points show  
300 significant Spearman correlations to mutual information (-0.49,  $p < 0.001$  and -0.62,  $p < 0.001$   
301 respectively) (Fig. 4d, e). These correlations indicate that mutual information between pairs of  
302 cirri tends to increase with proximity and also tends to increase with similarity between fiber-  
303 cortex contact locations, so the cirri with the highest mutual information are those that are close  
304 together with similar fiber-cortex connections (Fig. 4d-f). Together, these observations strongly  
305 support a mechanical coordination mechanism in which microtubule bundles allow groups of  
306 cirri to influence successive behavior of other groups of cilia.

307

## 308 **Discussion**

309 In order to meet the challenge of accounting for the emergence of apparently  
310 sophisticated cellular behavior, we conceptualized the cell as a finite state machine.  
311 Traditionally, studies of computational processes performed by cells have tended to focused on  
312 combinatorial logic, where the output of a computational process depends only on the current  
313 input, performed by networks of molecules in bacterial cells<sup>25,32-34</sup>. We have focused on  
314 sequential logic, where outputs depend on the system state as well, an equally important aspect  
315 of the theory of computation with notable yet less developed representation in studies of cellular  
316 and sub-cellular dynamics<sup>16,20,78</sup>. Behavior of eukaryotes has frequently been observed to  
317 involve stereotyped transitions between dynamical states, and our results suggest that automata  
318 theory, which includes finite state machine models and necessarily involves sequential logic,  
319 may be particularly well-suited to studying the behavior of eukaryotic cells. Our approach,

320 relying on dimensionality reduction to identify dynamical states, revealed modularity in cellular  
321 dynamics associated with structural modularity of the cell (Fig. 2, 4) in addition to cyclic  
322 patterns of sequential dynamical activity (Fig. 3).

323 Walking locomotion in *Euplotes* represents a departure from many of the best studied  
324 appendage-based locomotor systems. For example, limbed locomotion in animals tends to  
325 proceed by highly stereotyped, determinate patterns of activity <sup>57,58</sup>, and many small, aquatic  
326 animals exhibit periodic movements of appendages, often cilia, during locomotion <sup>7,59,79</sup>. Many  
327 forms of unicellular locomotion involve such dynamics as well including in sperm cells <sup>80</sup>,  
328 diverse flagellates with various numbers of flagella <sup>59</sup>, and ciliates <sup>59,81,82</sup>. Even in cases where  
329 cellular locomotion involves fundamentally stochastic dynamics such as in run-and-tumble  
330 motility in *E. coli* <sup>12</sup> or analogous behaviors observed in protists <sup>11,83-85</sup>, motility can be described  
331 by equilibrium processes <sup>5</sup>, in contrast to the non-equilibrium character of the gait of *Euplotes*.  
332 There are examples, however, of locomotor dynamics in both animals and unicellular organisms  
333 that are reminiscent of those we have observed in *Euplotes*. Gait switching in kangaroo rats has  
334 been shown to have a stochastic, non-equilibrium character, perhaps to facilitate predator  
335 avoidance by being difficult to predict <sup>52</sup>. Most saliently, gait switching in an octoflagellate <sup>5</sup> and  
336 motility dynamics in cultured mammalian cells <sup>45</sup> have been shown to exhibit broken detailed  
337 balance. We propose that broken detailed balance in the gait of *Euplotes* indicates active  
338 coordination of motility processes. Here, broken detailed balance in gait state transitions revealed  
339 cyclic activity, characterized by transitions into and out of a resting state with a mixture of  
340 stereotypy and variability in the intervening steps, in the gait of a single cell (Fig. 3, 4). To  
341 explain how these dynamics give rise to directed walking, we propose a mechanism in which  
342 biased, actively controlled cyclic transitions serve to establish strain, effectively storing stress, in

343 certain cirri, and the spontaneous release of these cirri from the substrate, during a series of  
344 unbiased gait state transitions, allows the cell to move forward. The cloud of unbiased transitions  
345 associated with substantial cellular movement is consistent with the fact that the details of the  
346 precise order in which the strained cirri are released does not matter for generating motility.  
347 Consistent with this mechanism, inspection of videos revealed that substantial cell movement  
348 appears to be correlated with the movement of notably bent inactive cirri. Return to the cycle  
349 states then are necessary to establish this process anew by winding up the system for continued  
350 cell movement. This mechanism and these patterns of cirral activity are consistent with previous  
351 observations of cyclic velocity fluctuations in the trajectories of walking *Euplotes*<sup>37</sup>. We argue  
352 that subcellular processes must be involved in actively coordinating cirri in order to accomplish  
353 the observed stereotypy in biased sequential activity. Our analysis of the tubulin-based  
354 cytoskeletal fiber system is consistent with its role in mechanically mediating communication  
355 among cirri and between cirri and cell cortex (Fig. 4). Thus, by combining information  
356 processing to properly dictate patterns of cirral activity and the mechanical actions of cirral  
357 movement, walking *Euplotes* embodies the sequential computation of a finite state machine.

358         Among the domains of life, eukaryotes uniquely display remarkable complexity and  
359 diversity in cellular behavior<sup>86</sup>. Our approach, grounded in finite state-machine analysis, has  
360 revealed modularity and stereotypy underlying a complex cellular behavior, implicating a  
361 machine-like process. Our results suggest that integrating approaches from theoretical computer  
362 science, non-equilibrium statistical physics, and cell biology stands to shed light on the  
363 regulation of cellular behavior in eukaryotes more broadly. By revealing principles of cellular  
364 behavior, the line of research established here stands to advance our ability to predict and even  
365 one day engineer cellular behavior across diverse eukaryotic systems.



366

367 **References**

- 368 1. Jennings, H. S. *Behavior of the lower organisms. Behavior of the lower organisms.*  
369 (Columbia University Press, 1906). doi:10.1037/10817-000
- 370 2. Reid, C. R. *et al.* Decision-making without a brain: how an amoeboid organism solves the  
371 two-armed bandit. *J. R. Soc. Interface* **13**, 20160030 (2016).
- 372 3. Coyle, S. M., Flaum, E. M., Li, H., Krishnamurthy, D. & Prakash, M. Coupled Active  
373 Systems Encode an Emergent Hunting Behavior in the Unicellular Predator *Lacrymaria*  
374 *olor*. *Curr. Biol.* **29**, 3838-3850.e3 (2019).
- 375 4. Battle, C. *et al.* Broken detailed balance at mesoscopic scales in active biological systems.  
376 *Science* **352**, 604–7 (2016).
- 377 5. Wan, K. Y. & Goldstein, R. E. Time Irreversibility and Criticality in the Motility of a  
378 Flagellate Microorganism. *Phys. Rev. Lett.* **121**, 58103 (2018).
- 379 6. Woznica, A. *et al.* Bacterial lipids activate, synergize, and inhibit a developmental switch  
380 in choanoflagellates. *Proc. Natl. Acad. Sci. U. S. A.* **113**, 7894–7899 (2016).
- 381 7. Wan, K. Y. Coordination of eukaryotic cilia and flagella. *Essays Biochem.* **62**, 829–838  
382 (2018).
- 383 8. Nomura, M. & Ishida, K. I. Fine-structural Observations on Siliceous Scale Production  
384 and Shell Assembly in the Testate Amoeba *Paulinella chromatophora*. *Protist* **167**, 303–  
385 318 (2016).
- 386 9. Bennett, R. R. & Golestanian, R. A steering mechanism for phototaxis in  
387 *Chlamydomonas*. *J. R. Soc. Interface* **12**, 20141164–20141164 (2015).
- 388 10. Machemer, H. The swimming cell and its world: Structures and mechanisms of orientation

- 389 in protists. *Eur. J. Protistol.* **37**, 3–14 (2001).
- 390 11. Almagor, M., Ron, A. & Bar-Tana, J. Chemotaxis in *Tetrahymena thermophila*. *Cell*  
391 *Motil.* **1**, 261–268 (1981).
- 392 12. Berg, H. C. & Brown, D. A. Chemotaxis in *Escherichia coli* analysed by three-  
393 dimensional tracking. *Nature* **239**, 500–504 (1972).
- 394 13. Nakagaki, T., Yamada, H. & Tóth, Á. Maze-solving by an amoeboid organism. *Nature*  
395 **407**, 470–470 (2000).
- 396 14. Tweedy, L. *et al.* Seeing around corners: Cells solve mazes and respond at a distance  
397 using attractant breakdown. *Science (80-. ).* **369**, (2020).
- 398 15. Applewhite, P. B. Learning in Protozoa. in *Biochemistry and Physiology of Protozoa* 341–  
399 355 (Elsevier, 1979). doi:10.1016/b978-0-12-444601-4.50018-7
- 400 16. Dexter, J. P., Prabakaran, S. & Gunawardena, J. A Complex Hierarchy of Avoidance  
401 Behaviors in a Single-Cell Eukaryote. *Curr. Biol.* **29**, 4323-4329.e2 (2019).
- 402 17. Jennings, H. S. Studies on reactions to stimuli in unicellular organisms. IX—On the  
403 behavior of fixed infusoria (*Stentor* and *Vorticella*), with special reference to the  
404 modifiability of protozoan reactions. *Am. J. Physiol. Content* **8**, 23–60 (1902).
- 405 18. Tang, S. K. Y. & Marshall, W. F. Cell learning. *Current Biology* **28**, R1180–R1184  
406 (2018).
- 407 19. Lyon, P. The cognitive cell: Bacterial behavior reconsidered. *Frontiers in Microbiology* **6**,  
408 (2015).
- 409 20. Marshall, W. F. Cellular Cognition: Sequential Logic in a Giant Protist. *Current Biology*  
410 **29**, R1303–R1305 (2019).
- 411 21. Greenfield, D. *et al.* Self-Organization of the *Escherichia coli* Chemotaxis Network

- 412           Imaged with Super-Resolution Light Microscopy. *PLoS Biol.* **7**, e1000137 (2009).
- 413   22.   Wan, K. Y. & Goldstein, R. E. Coordinated beating of algal flagella is mediated by basal  
414           coupling. *Proc. Natl. Acad. Sci. U. S. A.* **113**, E2784-93 (2016).
- 415   23.   Höfer, T., Sherratt, J. A. & Maini, P. K. Dictyostelium discoideum : cellular self-  
416           organization in an excitable biological medium. *Proc. R. Soc. London. Ser. B Biol. Sci.*  
417           **259**, 249–257 (1995).
- 418   24.   Kantsler, V., Dunkel, J., Polin, M. & Goldstein, R. E. Ciliary contact interactions  
419           dominate surface scattering of swimming eukaryotes. *Proc. Natl. Acad. Sci. U. S. A.* **110**,  
420           1187–1192 (2013).
- 421   25.   Bray, D. *Wetware*. (Yale University Press, 2009).
- 422   26.   Pfeifer, R., Lungarella, M. & Iida, F. Self-organization, embodiment, and biologically  
423           inspired robotics. *Science* **318**, 1088–1093 (2007).
- 424   27.   Regev, A. & Shapiro, E. Cellular abstractions: Cells as computation. *Nature* **419**, 343–343  
425           (2002).
- 426   28.   Mitchell, M. Biological Computation. *Comput. J.* **55**, 852–855 (2012).
- 427   29.   Navlakha, S. & Bar-Joseph, Z. Algorithms in nature: the convergence of systems biology  
428           and computational thinking. *Mol. Syst. Biol.* **7**, 546 (2011).
- 429   30.   Savin, T. *et al.* On the growth and form of the gut. *Nature* **476**, 57–62 (2011).
- 430   31.   Mehta, P. & Schwab, D. J. Energetic costs of cellular computation. *Proc. Natl. Acad. Sci.*  
431           *U. S. A.* **109**, (2012).
- 432   32.   Berg, H. C. & Purcell, E. M. Physics of chemoreception. *Biophys. J.* **20**, 193–219 (1977).
- 433   33.   Bialek, W. & Setayeshgar, S. Physical limits to biochemical signaling. *Proc. Natl. Acad.*  
434           *Sci. U. S. A.* **102**, 10040–5 (2005).

- 435 34. Mehta, P. & Schwab, D. J. Energetic costs of cellular computation. *Proc. Natl. Acad. Sci.*  
436 *U. S. A.* **109**, 17978–17982 (2012).
- 437 35. Andrews, L. B., Nielsen, A. A. K. & Voigt, C. A. Cellular checkpoint control using  
438 programmable sequential logic. *Science (80-. )*. **361**, (2018).
- 439 36. Gilbert, J. J. Jumping behavior in the oligotrich ciliates *Strobilidium velox* and *Halteria*  
440 *grandinella*, and its significance as a defense against rotifer predators. *Microb. Ecol.* **27**,  
441 189–200 (1994).
- 442 37. Lueken, W., Ricci, N. & Krüppel, T. Rhythmic spontaneous depolarizations determine a  
443 slow-and-fast rhythm in walking of the marine hypotrich *Euplotes vannus*. *Eur. J.*  
444 *Protistol.* **32**, 47–54 (1996).
- 445 38. Erra, F., Iervasi, A., Ricci, N. & Banchetti, R. Movement of the cirri during the creeping  
446 of *Euplotes crassus* (Ciliata, Hypotrichida). *Can. J. Zool.* **79**, 1353–1362 (2001).
- 447 39. Taylor, C. V. The neuromotor system of *Euplotes*. *Exp. Biol. Med.* **16**, 101–103 (1919).
- 448 40. Syberg-Olsen, M. J. *et al.* Biogeography and character evolution of the ciliate genus  
449 *Euplotes* (Spirotrichea, Euplotia), with description of *Euplotes curdsi* sp. nov. *PLoS One*  
450 **11**, (2016).
- 451 41. Ricci, N., Giannetti, R. & Miceli, C. The ethogram of *Euplotes crassus* (ciliata,  
452 hypotrichida): I. The wild type. *Eur. J. Protistol.* **23**, 129–140 (1988).
- 453 42. Li, Y., Shi, L. & Gu, F. Comparison of ciliature microtubule organelles in three  
454 hypotrichous ciliate species\*. *Chinese J. Oceanol. Limnol.* **28**, 443–450 (2010).
- 455 43. Fleury, A. Dynamics of the cytoskeleton during morphogenesis in the ciliate *Euplotes* I.  
456 Basal bodies related microtubular system. *Eur. J. Protistol.* **27**, 99–114 (1991).
- 457 44. Purcell, E. M. Life at low Reynolds number. *Am. J. Phys.* **45**, 3–11 (1977).

- 458 45. Kimmel, J. C., Chang, A. Y., Brack, A. S. & Marshall, W. F. Inferring cell state by  
459 quantitative motility analysis reveals a dynamic state system and broken detailed balance.  
460 *PLoS Comput. Biol.* **14**, e1005927 (2018).
- 461 46. Chang, A. Y. & Marshall, W. F. Dynamics of living cells in a cytomorphological state  
462 space. *Proc. Natl. Acad. Sci. U. S. A.* **116**, 21556–21562 (2019).
- 463 47. Boltzmann, L. Weirere Studien uber das warmegleich-gewich unter gasmolekulen.  
464 *Sitzungsberichte der Akad. der Wissenschaften, Vienna, part II* **66**, 275–370 (1872).
- 465 48. Alberts, B. *et al.* *Molecular biology of the cell.* (Garland Science, 2002).
- 466 49. Shalizi, C. R. & Crutchfield, J. P. Computational Mechanics: Pattern and Prediction,  
467 Structure and Simplicity. *J. Stat. Phys.* **104**, 817–879 (2001).
- 468 50. Crutchfield, J. P. The calculi of emergence: computation, dynamics and induction. *Phys.*  
469 *D Nonlinear Phenom.* **75**, 11–54 (1994).
- 470 51. Hopcroft, J. E., Motwani, R. & Ullman, J. D. *Introduction to Automata Theory,*  
471 *Languages, and Computation.* (Pearson Education, 2008).
- 472 52. Moore, T. Y., Cooper, K. L., Biewener, A. A. & Vasudevan, R. Unpredictability of escape  
473 trajectory explains predator evasion ability and microhabitat preference of desert rodents.  
474 doi:10.1038/s41467-017-00373-2
- 475 53. Goldstein, R. E. Green Algae as Model Organisms for Biological Fluid Dynamics. *Annu.*  
476 *Rev. Fluid Mech.* **47**, 343–375 (2015).
- 477 54. Simon, M. & Plattner, H. Unicellular Eukaryotes as Models in Cell and Molecular  
478 Biology: Critical Appraisal of Their Past and Future Value. in *International Review of*  
479 *Cell and Molecular Biology* **309**, 141–198 (Elsevier Inc., 2014).
- 480 55. Durham, W. M. *et al.* Turbulence drives microscale patches of motile phytoplankton. *Nat.*

- 481            *Commun.* **4**, (2013).
- 482    56.    Mogilner, A. & Oster, G. Cell motility driven by actin polymerization. *Biophys. J.* **71**,  
483            3030–3045 (1996).
- 484    57.    Collins, J. J. & Stewart, I. N. Coupled nonlinear oscillators and the symmetries of animal  
485            gaits. *J. Nonlinear Sci.* **3**, 349–392 (1993).
- 486    58.    McNeill Alexander, R. *Principles of Animal Locomotion*. (Princeton University Press,  
487            2003).
- 488    59.    Wan, K. Y. & Jékely, G. On the unity and diversity of cilia. *Philos. Trans. R. Soc. Lond.*  
489            *B. Biol. Sci.* **375**, 20190148 (2020).
- 490    60.    Ahamed, T., Costa, A. C. & Stephens, G. J. Capturing the Continuous Complexity of  
491            Behavior in *C. elegans*. doi:10.1101/827535
- 492    61.    Stephens, G. J., Johnson-Kerner, B., Bialek, W. & Ryu, W. S. Dimensionality and  
493            Dynamics in the Behavior of *C. elegans*. *PLoS Comput. Biol.* **4**, e1000028 (2008).
- 494    62.    Berman, G. J., Choi, D. M., Bialek, W. & Shaevitz, J. W. Mapping the stereotyped  
495            behaviour of freely moving fruit flies. *J. R. Soc. Interface* **11**, 20140672 (2014).
- 496    63.    Stephens, G. J., Osborne, L. C. & Bialek, W. Searching for simplicity: Approaches to the  
497            analysis of neurons and behavior. *Proc. Natl. Acad. Sci. U. S. A.* **108**, 15565–15571  
498            (2010).
- 499    64.    Kanagal, B. & Sindhvani, V. Rank Selection in Low-rank Matrix Approximations: A  
500            Study of Cross-Validation for NMFs. in *Advances in Neural Information Processing*  
501            *Systems* **23**, (2010).
- 502    65.    Owen, A. B. & Perry, P. O. Bi-Cross-Validation of the SVD and the Nonnegative Matrix  
503            Factorization. *Source Ann. Appl. Stat.* **3**, 564–594 (2009).

- 504 66. Ester, M., Kriegel, H.-P., Sander, J. & Xu, X. *A Density-Based Algorithm for Discovering*  
505 *Clusters in Large Spatial Databases with Noise*. (1996).
- 506 67. Kauffman, L. & Rousseeuw, P. J. *Finding Groups in Data: and introduction to cluster*  
507 *analysis*. (John Wiley & Sons, Inc., 1990). doi:10.1002/9780470316801
- 508 68. Kirkegaard, J. B., Marron, A. O. & Goldstein, R. E. Motility of Colonial  
509 Choanoflagellates and the Statistics of Aggregate Random Walkers. *Phys. Rev. Lett.* **116**,  
510 038102 (2016).
- 511 69. M Cartmill. Climbing. in *Functional Vertebrate Morphology* 73–88 (Harvard University  
512 Press, 1985).
- 513 70. Markov, A. A. Extension of the Limit Theorems of Probability Theory to a Sum of  
514 Variables Connected in a Chain. *Notes Imp. Acad. Sci. St. Petersburg. VIII Ser. Physio-*  
515 *Mathematical Coll.* **22**, (1907).
- 516 71. Howard, R. A. *Dynamic and Probabilistic Systems, Volume 1: Markov models*. (Dover  
517 Publications, 1971).
- 518 72. Gagniuc, P. *Markov Chains: From Theory to Implementation and Experimentation*.  
519 (Wiley, 2017).
- 520 73. Billingsley, P. *Statistical Methods in Markov Chains. The Annals of Mathematical*  
521 *Statistics* **32**, 12–40 (Institute of Mathematical Statistics, 1961).
- 522 74. Crutchfield, J. P. & Young, K. Computation at the Onset of Chaos. in *Complexity,*  
523 *Entropy, and Physics of Information* (ed. Zurek, W.) (Addison-Wesley, 1989).
- 524 75. Crutchfield, J. P. & Young, K. Inferring statistical complexity. *Phys. Rev. Lett.* **63**, 105–  
525 108 (1989).
- 526 76. Taylor, C. V. Demonstration of the function of the neuromotor apparatus in Euplotes by

- 527 the method of microdissection. *Naturwissenschaften* **9**, 910 (1921).
- 528 77. Okajima, A. & Kinosita, H. Ciliary activity and coordination in *Euplotes eurystomus*-I.  
529 Effect of microdissection of neuromotor fibres. *Comp. Biochem. Physiol.* **19**, 115–131  
530 (1966).
- 531 78. Bar-Ziv, R., Tlusty, T. & Libchaber, A. Protein-DNA computation by stochastic assembly  
532 cascade. *Proc. Natl. Acad. Sci. U. S. A.* **99**, 11589–11592 (2002).
- 533 79. Guasto, J. S., Rusconi, R. & Stocker, R. Fluid Mechanics of Planktonic Microorganisms.  
534 *Annu. Rev. Fluid Mech.* **44**, 373–400 (2012).
- 535 80. Goldstein, R. E., Polin, M. & Tuval, I. Noise and Synchronization in Pairs of Beating  
536 Eukaryotic Flagella. *Phys. Rev. Lett.* **103**, 168103 (2009).
- 537 81. Párducz, B. Ciliary Movement and Coordination in Ciliates. *Int. Rev. Cytol.* **21**, 91–128  
538 (1967).
- 539 82. Funfak, A. *et al.* Paramecium swimming and ciliary beating patterns: A study on four  
540 RNA interference mutations. *Integr. Biol. (United Kingdom)* **7**, 90–100 (2015).
- 541 83. Kirkegaard, J. B., Bouillant, A., Marron, A. O., Leptos, K. C. & Goldstein, R. E.  
542 Aerotaxis in the closest relatives of animals. *Elife* **5**, e18109 (2016).
- 543 84. Miño, G. L., Koehl, M. A. R., King, N. & Stocker, R. Finding patches in a heterogeneous  
544 aquatic environment: pH-taxis by the dispersal stage of choanoflagellates. *Limnol.*  
545 *Oceanogr. Lett.* **2**, 37–46 (2017).
- 546 85. Polin, M., Tuval, I., Drescher, K., Gollub, J. P. & Goldstein, R. E. *Chlamydomonas*  
547 Swims with Two ‘Gears’ in a Eukaryotic Version of Run-and-Tumble Locomotion.  
548 *Science (80-. ).* **325**, 487–490 (2009).
- 549 86. Keeling, P. J. Combining morphology, behaviour and genomics to understand the



- 550 evolution and ecology of microbial eukaryotes. *Philos. Trans. R. Soc. B Biol. Sci.* **374**,  
551 (2019).
- 552 87. Kahl, A. *Urtiere oder Protozoa*. (Fischer, 1935).
- 553 88. Yocom, H. B. The neuromotor apparatus of *Euplotes patella*. (University of California,  
554 Berkeley, 1917).
- 555 89. Kawamoto, T. & Kabashima, Y. Cross-validation estimate of the number of clusters in a  
556 network. *Sci. Rep.* **7**, 1–17 (2017).
- 557
- 558

559 **Figures**

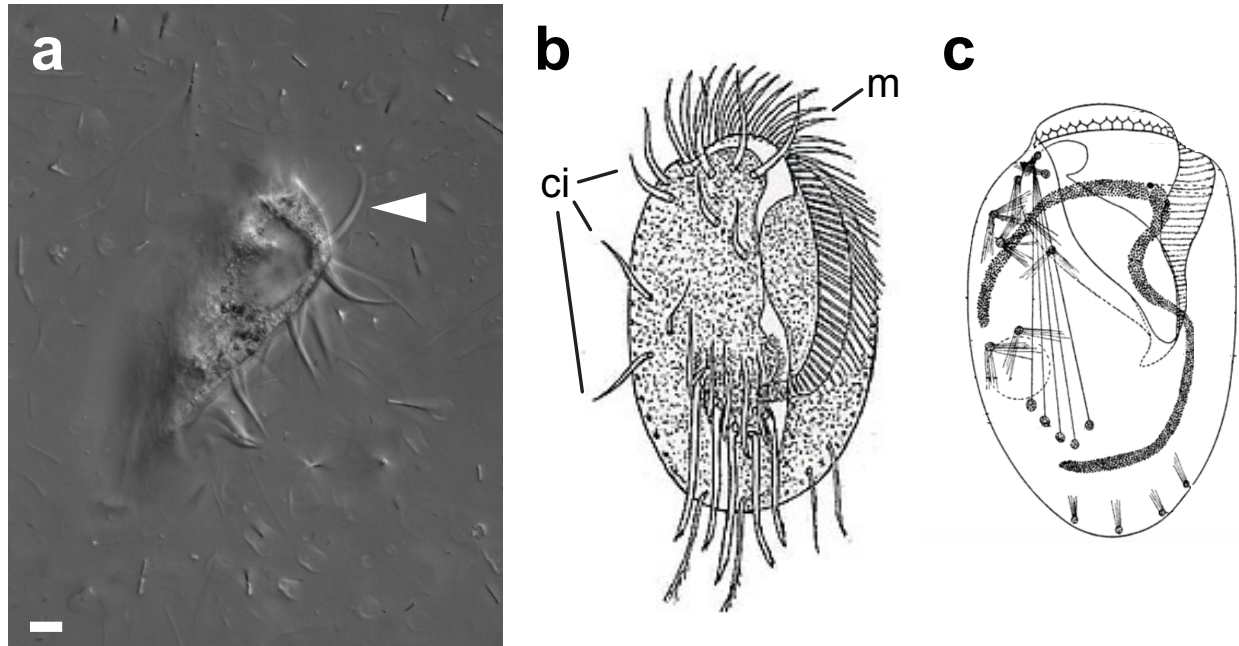

560

561 **Figure 1.** *Euplotes* exhibits highly polarized, complex cellular architecture and walks  
562 across surfaces using microtubule-based organelles called cirri, some of which are physically  
563 linked. Scale bar is 10 μm. **a,** A single *Euplotes eurystomus* cell in profile displays its ventral  
564 cirri, which are used for walking locomotion across surfaces (arrowhead indicates a single cirrus  
565 stretching out from the cell). **b,** A drawing of a *Euplotes* cell, viewed from the ventral surface,  
566 highlighting the complex, asymmetric structure of the cell. Notable features include the cirri (ci)  
567 and the membranellar band (m), wrapping from the top of the cell to the center, which is used to  
568 generate a feeding current to draw in prey items. Drawing adapted and obtained from Wikimedia  
569 Commons, from original source <sup>87</sup>. **c,** A drawing of a *Euplotes* cell, highlighting the fiber system  
570 associated with the cirri, historically referred to as the neuromotor apparatus. Drawing adapted  
571 from <sup>88</sup>.

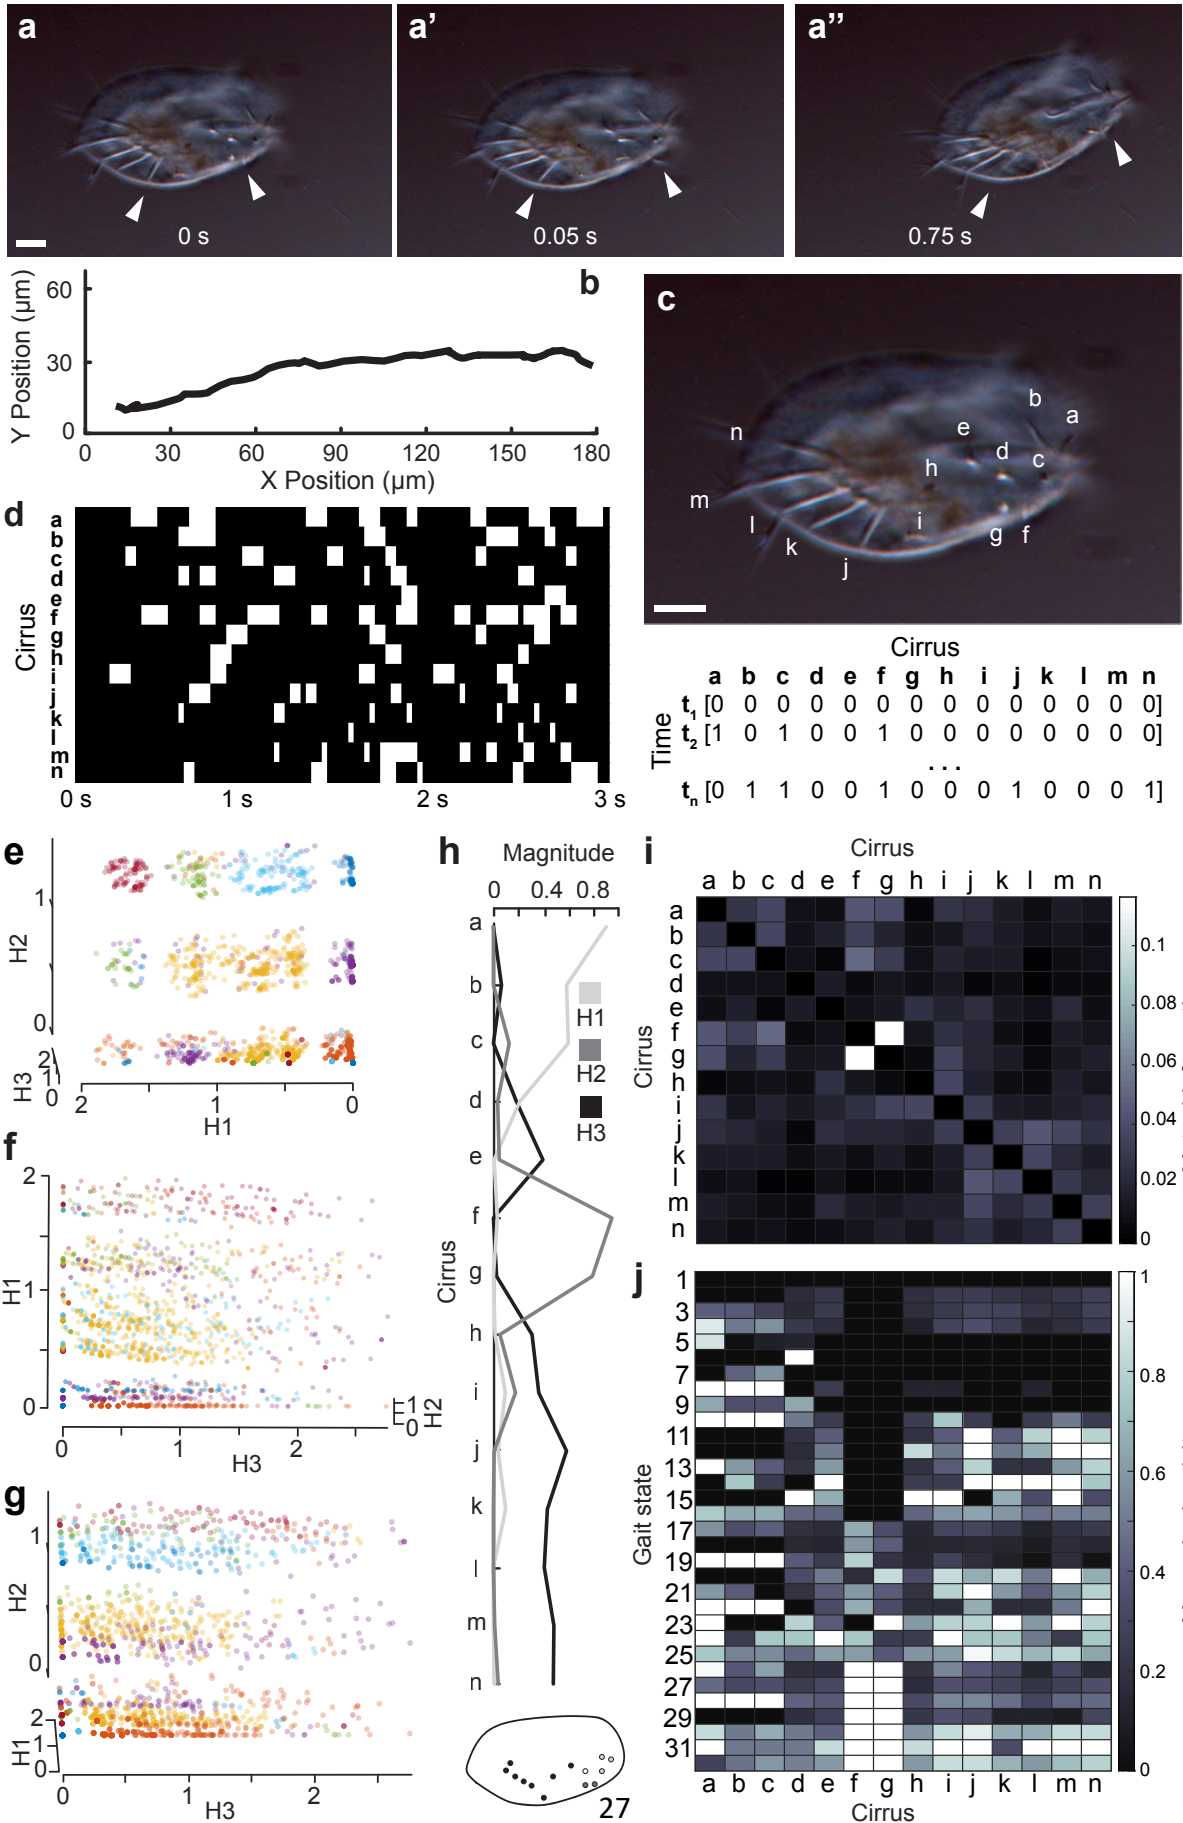

573           **Figure 2.** The gait of *Euplotes* can be described in a discrete, reduced state space with gait  
574 states corresponding to identifiable patterns of cirral activity. **a-a''**, The movements of cirri  
575 during walking locomotion are clearly visible by brightfield microscopy by focusing on a plane  
576 at the surface of the coverslip on which cells are walking. Three snapshots depict different time  
577 points during a single walking trajectory, and white arrowheads indicate cirri. In the panels from  
578 left to right, the cirrus indicated by the arrowhead on the left is stationary, stationary, and then  
579 moving, and the cirrus indicated by the arrowhead on the right is stationary, moving, and then  
580 stationary. Scale bar is 15  $\mu\text{m}$ . **b**, The trajectory of a cell during a single recorded trajectory as  
581 the cell walked across a coverslip from left to right. The cell position was manually tracked in  
582 each frame. **c**, The scheme for encoding cirral dynamics during walking involved labeling each  
583 of the 14 distinguishable ventral cirri (a-n), and recording cirral activity in each frame,  
584 corresponding to timepoints ( $t_1, \dots, t_n$ ), of recordings of walking cells as a 14-bit binary vector.  
585 Each entry in each vector is given a value of either 0 if the cirrus is not moving and in contact  
586 with the coverslip or 1 if the cirrus is moving. Scale bar is 15  $\mu\text{m}$ . **d**, Representative visualization  
587 of cirral dynamics for a single trajectory of a walking cell. These dynamics correspond to the  
588 walking trajectory in **b**. Each row corresponds to a cirrus and each column is a single video  
589 frame. White denotes cirral activity, a value of 1, in the vector encoding of dynamics from **c**.  
590 Note the dynamical complexity and discrete, stepping-like nature of cirral movements. **e-g**,  
591 Three roughly orthogonal views of a plot displays the structure of all recorded cirral dynamics  
592 encoded as in Figure 2C from 13 cells over 2343 timepoints in a reduced state space obtained by  
593 non-negative matrix factorization (NMF). Axes correspond to the components of the NMF (H1,  
594 H2, H3), and each point is a single timepoint. Randomized colors highlight the 32 clusters  
595 identified using the density-based spatial clustering of applications with noise (DBSCAN)

596 algorithm<sup>66</sup>. We refer to these clusters as gait states, and they correspond to unique  
597 configurations of cirral activity during walking locomotion (see panel F). **h**, Plot of the  
598 magnitudes associated with each cirrus corresponding to the components of the NMF of cirral  
599 dynamics shows distinct contributions from spatially distinct groups of cirri. Component H1, for  
600 example, is associated with activity in cirri a, b, and c. The tracing of a cell including the position  
601 of cirri has the same color map as the plot above and shows the grouping of the cirri  
602 corresponding to each component. **i**, A heatmap of mutual information between all pairs of cirri  
603 shows that correlations in cirral activity correspond to the NMF components displayed in **d**. For  
604 example, cirri a, b, and c share mutual information with one another and are the cirri contributing  
605 to component H1. **j**, A heatmap representation of the cirral activity associated with each of the 32  
606 gait states. Values for each cirrus are the mean over all instances of the gait state. Note that each  
607 gait state has a unique signature of cirral activity.  
608

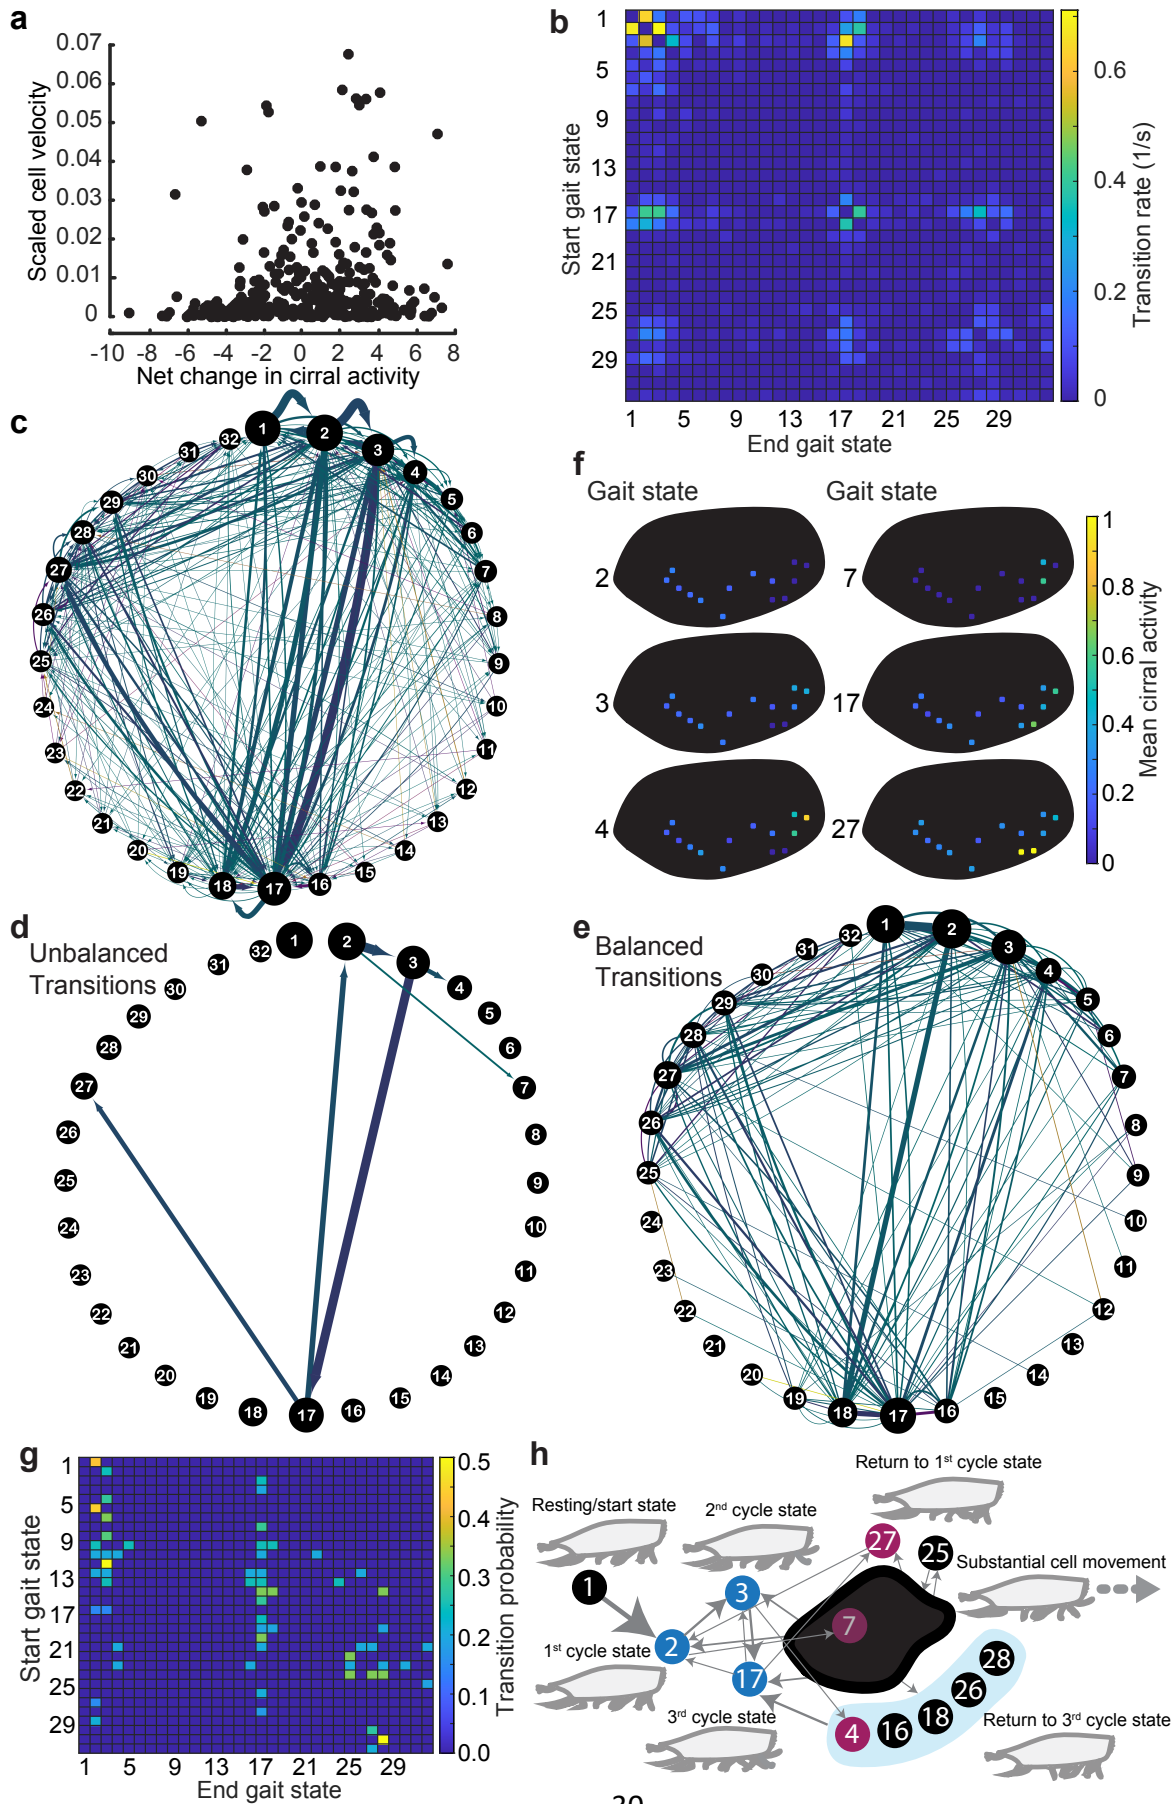

610           **Figure 3.** *Euplotes* walks with a cyclic stochastic gait exhibiting broken detailed balance,  
611           stereotypy, and state machine-like dynamics. All data is pooled from the walking trajectories of  
612           13 different cells over 2343 timepoints and 1423 pairwise gait state transitions. **a**, A plot of the  
613           mean net change in cirral activity versus the net scaled cell velocity associated with all  
614           transitions between the 32 gait states identified in Fig. 3 shows that the change in number of  
615           active cirri is not strongly correlated with cell velocity ( $R^2=0.03$ ). Cell velocities were obtained  
616           from manually tracked walking trajectories and then scaled by dividing frame to frame  
617           displacements for each trajectory by the length of the cell being tracked and also dividing by the  
618           average frequency of cirral inactivity. Scaling provided a non-dimensional velocity scaled by  
619           natural units of the system. Note that at low Reynolds number, velocity should be proportional to  
620           force<sup>44</sup>, so this plot also reflects the net walking force generated by the cell. Net change in cirral  
621           activity was computed using the data presented in Fig. 3F. Note that the largest velocities are  
622           associated with small negative and small to moderate positive net changes in cirral activity. **b**,  
623           The transition matrix of all gait state transitions, with rows representing the starting state and  
624           columns indicating the ending state, exhibits broken detailed balance. Rates were estimated by  
625           dividing the total number of observed transitions between each state pair and dividing by the  
626           total time observed. Under detailed balance or equilibrium conditions, transitions from one state  
627           to another should be balanced by reverse transitions. Lack of this kind of reversibility, as seen by  
628           the lack of symmetry of the heatmap across the diagonal, indicates broken detailed balance and  
629           non-equilibrium dynamics. **c**, A directed graph representation of all gait state transitions. Nodes  
630           correspond to the 32 gait states, and node sizes are scaled by the proportion of total time cells  
631           spent in each state. Directed edges are represented by arrows between nodes and signify state  
632           transitions. The size of the arrows is scaled by transition rates as in **b**. Edge color represents

633 scaled cell velocity as in **a**, with cool colors (more cyan) representing lower velocity, and  
634 warmer colors (more magenta) representing higher velocity. **d**, A subset of transitions visualized  
635 as in **c** shows the restricted and relatively high frequency nature of unbalanced, non-equilibrium-  
636 like transitions. Only transitions that were observed to happen more than one time and exhibiting  
637 a significant difference between forward and reverse transitions ( $p < 0.05$  by binomial test, see  
638 Methods for more details) are displayed. **e**, A subset of transitions, similarly to panel E, except  
639 that only the balanced transitions, lacking a significant difference between forward and reverse  
640 transitions ( $p < 0.05$  by binomial test) are displayed, also show a complex and widespread  
641 structure, this time of balanced, equilibrium transitions. Note that the majority of transitions  
642 associated with high cell velocity involve equilibrium-like dynamics. **f**, Examples illustrating the  
643 spatial organization of cirral activity corresponding to gait states. Some states, such as 7,  
644 correspond to activity in spatially discrete groups of cirri, while others, such as 17, correspond to  
645 cirral activity across the cell. The gait states displayed here are those involved in unbalanced  
646 transitions. **g**, A heatmap of transition probabilities between states, showing only the most  
647 probable transitions from a given state with all others set to zero, shows distinct structure. In  
648 cases where multiple state transitions from a state were tied for the highest probability, all of these  
649 transitions are displayed. Fewer than half of the total states are recipients of multiple high  
650 probability transitions, and many states are the recipients of no high probability transitions. **h**, A  
651 representation of functional states and transitions between them highlights the machine-like  
652 nature of the gait of *Euplotes*. Gait states are represented as circles with numerical labels. Blue  
653 circles represent states that are both recipients and sources of unbalanced transitions as identified  
654 in **d** and constitute the three cycle states. Red circles represent states that are recipients but not  
655 sources of unbalanced transitions as identified in **d**. Black circles correspond to gait states that



656 are associated only with balanced transitions as in **e**. States receiving no more than one unique  
657 high probability transitions from states with only a single highest as identified in **g** were grouped  
658 together into a compound state represented by the dark gray blob. The blue background behind  
659 states 4, 16, 18, 26, and 28 indicates that these states all share the same highest probability  
660 transitions between states identified in this panel, and thus, the group constitutes a single  
661 compound functional state. Arrows represent the highest probability transitions between the  
662 states, including compound states composed of multiple gait states as identified in Fig. 2 and 3  
663 (dark gray blob and blue background). Gait state 1 is also depicted, as it is the state in which  
664 cells spent the most time over all walking trajectories and also is uniquely the state from which  
665 cells begin walking. Cells also frequently return to the state during walking. Further, transitions  
666 from gait state 2 from gait state 1 constitute the single highest frequency transition. Together, all  
667 identified states in this panel constitute functional states. Arrows represent the most probable  
668 transitions between functional states, and all unbalanced transitions are also represented with size  
669 scaled by their proportional probability compared to all other transitions emanating from the  
670 source functional state. Cartoons are a walking cell in profile with cirri in a configuration  
671 representative of the corresponding functional state. Labels refer to the apparent functional role  
672 of states and their associated transitions. Beginning from gait state 1, the resting/start state, cells  
673 are most likely to follow transitions from gait state 2 to 3 to 17 at which point cells are likely to  
674 enter the functional state associated with substantial cell movement involving variable balanced  
675 transitions between a number of gait states. Transitions are then likely to lead back toward the  
676 cycle states. Note that while this representation of gait dynamics highlights the most probable  
677 transitions, substantial variability, primarily involving reversible transitions, occurs during  
678 walking trajectories.

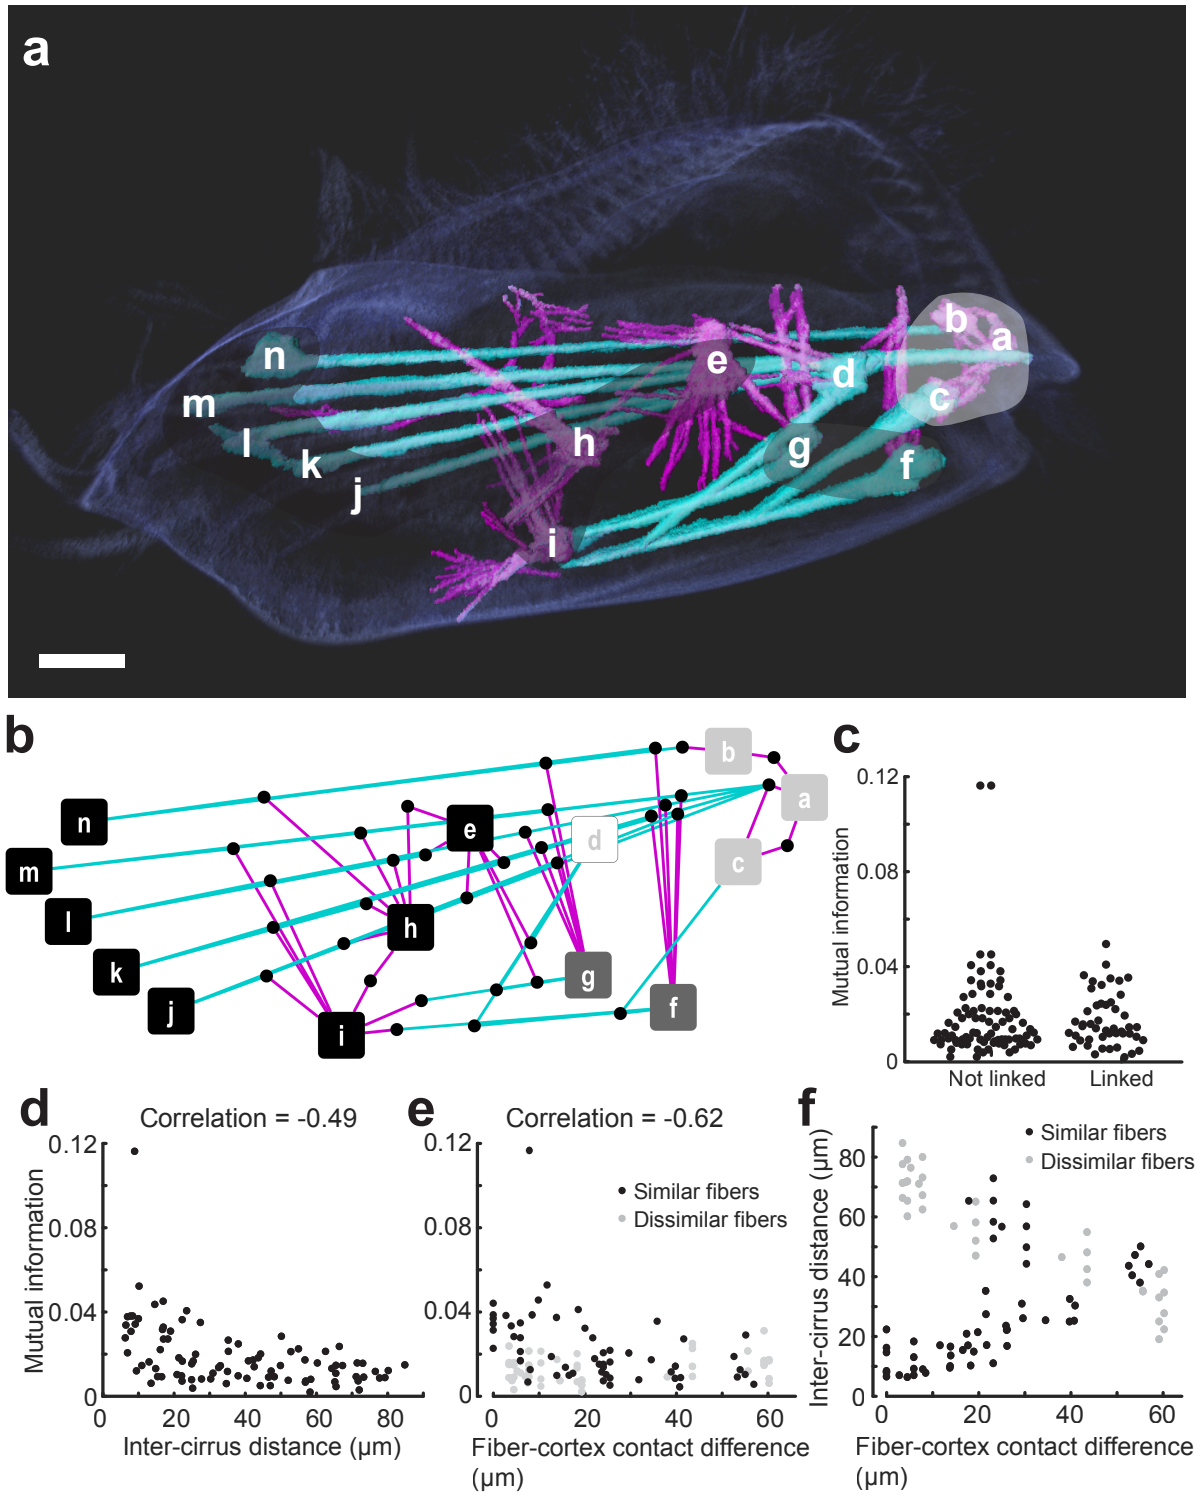

679

680

681

**Figure 4.** The fiber system of *Euplotes* is complex, interconnected, and constrains mechanistic hypotheses of gait coordination. **a**, The SiR-tubulin labeled cell (faint, dark blue)

682 was imaged by confocal microscopy, and a 3D reconstruction as obtained from serial confocal  
683 slices. Fibers were manually traced in each slice using TrakEM2 in FIJI. Two morphologically  
684 distinct classes of fibers were observed and are indicated as follows: thick, linear fibers are cyan  
685 and thinner, filamentous fibers are magenta (see Fig. S6 for raw image data). Fibers emanate  
686 from the base of each cirrus and form a connected network between all cirri. The base of each  
687 cirrus is indicated by corresponding letters (as in Fig. 2c). Gray shading indicates the dynamical  
688 groups identified by dimensionality reduction and follows the same color scheme as in Fig. 3d.  
689 Scale bar is 10  $\mu\text{m}$ . **b**, A graph representation of fiber-fiber connections illustrates the complex  
690 and interconnected nature of cirrus associated fiber topology. Nodes correspond to the cirri to  
691 which each fiber system is associated, and edges indicate connections between fiber systems.  
692 Colors of nodes indicate the same groups as in **a**, and colors of edges indicate the types of fibers  
693 connecting to one another, cyan for thick fiber connections, magenta for thin fiber connections,  
694 and purple for thick to thin fiber connections. **c**, Pairs of cirri that are linked by fiber-fiber  
695 contacts show no statistically significant difference in mutual information compared to those  
696 lacking fiber-fiber contacts. The plot displays mutual information between all pairs of cirri  
697 grouped by the absence (Not linked) or presence (Linked) of associated fiber-fiber connections.  
698 Statistical significance was evaluated by the Wilcoxon rank sum test. Note that when pairs of  
699 cirri are grouped by fiber-fiber connection type, we do observe an increase in mutual information  
700 for cirri associated with only thin fiber-fiber connection and only thick fiber-fiber connections  
701 compared to those lacking fiber-fiber connections (see Fig. S6). **d**, A plot of mutual information  
702 as a function of inter-cirrus distance displays negative correlation, with a Spearman correlation  
703 coefficient of -0.49 ( $p < 0.001$ ). Plotted values are defined with respect to pairs of cirri. **e**, A plot  
704 of mutual information as a function of fiber-cortex contact distance grouped by fiber type

705 similarity and lack thereof displays negative correlation, with a Spearman correlation coefficient  
706 of -0.62 ( $p < 0.001$ ) for pairs of cirri with similar fiber types and no significant correlation for  
707 those with dissimilar fiber types. Similarity of fiber types is defined in terms of sharing at least  
708 some fiber types as defined in **a**. Fiber-cortex contact difference is measured by the mean cross  
709 nearest neighbor distance (see Methods) for all fiber-cortex contact points associated with each  
710 cirrus. The negative correlation values from the data plotted in **d** and **e** indicate that cirri that are  
711 closer to one another and also cirri with fiber-cortex contacts in nearby regions of the cell tend to  
712 have higher mutual information, and indeed cirri that are both close to one another and with  
713 similar patterns of fiber-cortex contacts display the highest mutual information. **f**, A plot of fiber-  
714 cortex contact difference versus inter-cirrus difference (as in panels **d** and **e**) illustrates that  
715 nearby cirri tend to have similar associated fiber-cortex contacts, highlighting that nearby cirri  
716 with similar fiber-cortex contacts share the most mutual information.  
717

718 **Methods**

719 ***Cell husbandry***

720 Cultures of *Euplotes eurystomus* were obtained from Carolina Biological Supply Company (Item  
721 #131480). Individual cells were isolated from cultures, which contained other protists and  
722 meiofauna, by pipetting and placed in non-treated 6-well plates (Thermo Fischer Scientific 08-  
723 772-49) containing spring water taken from cultures. Cells were kept in wells for no longer than  
724 five days before imaging, and if cells were to be kept for longer than 48 hours, wells containing  
725 cells were supplemented with 1% Cereal Grass Medium<sup>1</sup> (from Thermo Fischer Scientific  
726 S25242) to prevent depletion of a population of prey bacteria and otherwise maintain *Euplotes*  
727 under constant growth conditions.

728

729 ***Live cell brightfield microscopy***

730 Cells were concentrated by centrifugation (500×g for 5 min) and resuspended either in 0.5 mL of  
731 spring water in coverglass bottomed FluoroDishes (World Precision Instruments FD35-100) or  
732 in 0.2 mL spring water on a coverslip (FisherScientific, 12-545-D) for imaging. No more than  
733 three cells were kept in 0.5 mL imaging samples and only one cell was ever kept in 0.2 mL  
734 imaging samples in order to minimize cell-cell interactions. Cells were observed to exhibit  
735 spontaneous walking activity on coverglass. Walking cells in FluoroDishes were imaged under  
736 brightfield illumination using a Zeiss Z.1 Observer and Hamamatsu Orca Flash 4.0 V2 CMOS  
737 camera (C11440-22CU) with a 20x, 0.8 NA Plan-Apochromat (Zeiss) objective. Cells on  
738 coverslips were imaged under brightfield illumination with coverslips inverted over a well  
739 containing a small amount of distilled water to reduce evaporation using a Zeiss Axio Zoom.V16  
740 and a PCO pco.dimax S1 camera. Importantly, in both imaging systems, the focal plane was set

741 at the interface between cirri of walking cells and the glass surface upon which they were  
742 walking. Images were acquired at 0.033 seconds per frame with a 0.005 second exposure in order  
743 to capture all cirral dynamics during walking with minimal blur.

744

### 745 *Quantification of walking dynamics*

746 Movies of walking cells were viewed using FIJI <sup>2</sup>. Movement of cirri, or lack thereof was  
747 clearly visible in each movie frame (see Fig. 2a and Movie S1). The dynamical state of each  
748 cirrus in each movie frame was manually annotated. For each frame, each cirrus received a label  
749 of “1” if the cirrus was in motion and “0” if the cirrus was not moving and in contact with the  
750 coverslip. Motion of cirri was evident in terms of a change in cirrus shape or tip position often in  
751 addition to blur due to motion during image acquisition or position out of the focal plane (see  
752 Fig. 2a and Movie S1). While only slowly walking cells were recorded, sometimes cells  
753 nevertheless exhibit brief, spontaneous departures from slow walking during the course of movie  
754 acquisition. Any frame in which the movement of the cell and/or cirri were too fast to be  
755 resolved, such as during spontaneous escape responses<sup>3</sup> (Movie S2), was excluded from analysis  
756 such that some videos were split into a number of separate continuous sequences. Thus, each  
757 movie frame associated with a particular time point in the walking trajectory, with the exception  
758 of those excluded from analysis as described, yielded a corresponding 14-element binary vector  
759 encoding the motility state of the cell in terms of the movement of cirri. Cell movement was  
760 tracked using the manual tracking feature of the TrackMate plugin in FIJI <sup>4</sup>. The center of each  
761 cell was used as the reference feature for tracking. We analyzed the walking dynamics of 13  
762 different cells.

763

## 764 ***Dimensionality reduction***

765           Dimensionality reduction was performed by non-negative matrix factorization (NMF)  
766 implemented in MATLAB release 2019b (Mathworks, Natick). NMF was chosen as a  
767 dimensionality reduction technique to allow us to obtain a reduced, sparse, and interpretable  
768 representation of walking dynamics. Because NMF derives non-negative factors, the basis  
769 vectors in NMF space correspond to patterns of cirral activity. NMF involves factoring data,  $A$ ,  
770 an  $n$  by  $m$  matrix, into non-negative factors  $W$ , an  $n$  by  $k$  matrix, and  $H$ , a  $k$  by  $m$  matrix where  
771 the product  $W^*H$  approximates  $A$ . To determine the appropriate number of dimensions or rank,  $k$ ,  
772 that are necessary to accurately represent the data without overfitting, we performed cross-  
773 validation by imputation with random holdouts <sup>5,6</sup>, also implemented in MATLAB. We randomly  
774 held out 15% of our walking dynamics data, performed NMF for a given  $k$ , and then used the  
775 NMF reconstruction  $W^*H$ , to update the missing data entries. This process of updating is known  
776 as imputation, and we repeated the imputation process 50 times, by which point the imputed  
777 values had stabilize, to obtain a final NMF reconstruction. We then computed the root mean  
778 squared residual (RMSR) between the final NMF reconstruction,  $W^*H$ , and our dataset,  $A$ . We  
779 performed this entire process 100 times for each value of  $k$ . As is generally the case for NMF, we  
780 observed a monotonic decrease in reconstruction error with increasing  $k$  without performing the  
781 imputation procedure <sup>7</sup> (Fig. S2a). In contrast to this trend, we observed an increase in RMSR of  
782 imputed values with increasing  $k$  indicating overfitting <sup>5</sup> (Fig. S2b). We chose  $k=3$  because this  
783 value was the highest value before a notable increase in imputation error (Fig. S2b), which  
784 would indicate overfitting <sup>5,6</sup>. Thus, our choice of rank 3 selects the lowest rank approximation  
785 that captures structure of the dataset without overfitting that structure. Further, our choice

786 facilitated the visual inspection of the structure of data in the reduced dimensional  
787 reconstruction.  
788 Finally, we noted that for our chosen value of  $k$ , due to the stochastic nature of the NMF  
789 algorithm, which involves a random initialization step, we obtained slightly different solutions  
790 for different iterations <sup>5</sup>. In order to choose the best reduced dimensional approximation,  
791 therefore, we performed NMF 500 times and chose the particular solution corresponding to the  
792 lowest RMSR compared to our dataset.

793

#### 794 ***Clustering***

795 Clustering on the dataset obtained using NMF was performed by density-based spatial  
796 clustering of applications with noise (DBSCAN) algorithm <sup>8</sup> implemented in MATLAB release  
797 2019b (Mathworks, Natick). Structure in NMF space was clearly visible (Fig. 2e-g), and  
798 DBSCAN using a Euclidean distance metric, was initially chosen as a clustering method because  
799 it yielded qualitatively good partitioning of the data. The DBSCAN algorithm involves stochastic  
800 search within neighborhoods of a given radius  $\epsilon$  around datapoints, and points with a minimum  
801 number of neighbors,  $n$ , within their neighborhood are grouped as belonging to the same cluster,  
802 leaving two free parameters to determine. We set  $\epsilon$  by first using the  
803 `clusterDBSCAN.estimateEpsilon` function in MATLAB (release 2020b, Phased Array System  
804 Toolbox), which yielded a value of 0.15. We next set about determining the minimum neighbor  
805 number,  $n$ . To do so, we computed the average Silhouette coefficient, a commonly used measure  
806 of clustering quality that indicates how well-separated clusters are <sup>9</sup>, for various values of  $n$ . The  
807 results of this analysis are plotted in Fig. S3. Higher Silhouette coefficients indicate better  
808 clustering, and we found that a value of  $n=8$  maximized the mean Silhouette coefficient (Fig.



809 S3a). We also noted, however, that for this value, many datapoints were found to be outliers, not  
810 belonging to any cluster due to having too few points within a distance of  $\epsilon$ . Fig. S3b displays  
811 percentage of datapoints found to be outliers as a function of  $n$ . In order to avoid categorizing  
812 more than 5% of datapoints as outliers, we chose to settle on  $n=4$ , which does not have a  
813 significantly different mean Silhouette coefficient compared to any of the others in the range  
814  $n=2-7$ . This choice was further supported by the fact that major clusters involving more than 5  
815 datapoints identified with  $n=8$  were also identified with  $n=4$ .

816         Although this set of parameters gave qualitatively and quantitatively reasonable  
817 clustering results, we sought to further refine our clusters and to further reduce the outlier  
818 datapoints. We noted the obvious partitioning of the NMF dataset into three groups along the H2  
819 axis (Fig. 2e). We found the previously determined parameter values to yield good clustering for  
820 the top and middle partitions ( $H2 \leq 1.1$  and  $0.2 < H2 < 1.1$ ), with no outliers. For the lower partition  
821 ( $H2 \leq 0.2$ ), however, we found that we were able to improve clustering by using  $\epsilon=0.1182$ . With  
822 this updated value, we found no statistically significant change in Silhouette coefficient and  
823 reduced outliers to 0%. The clusters obtained by this process constituted the identification of the  
824 32 gait states. We note here that the problem of determining the true or optimal number of  
825 clusters is an unresolved problem<sup>10</sup>, and we note that we have followed standard methods to  
826 determine cluster number, and we found that our key results do not depend sensitively on the  
827 precise number of clusters identified (see following section and Fig. S8 for more details).

828

### 829 ***State transition analysis***

830         Following dimensionality reduction and clustering to identify gait states, we proceeded to  
831 characterize state transition dynamics. For each cell trajectory, we identified all unique gait state

832 transitions for a total of 1423 unique pairwise transitions over the cumulative 2343 video frames  
833 for 77.14 s of recording. We computed empirical transition rates between states as the total  
834 number of observed transitions divided by the total time of observation. In order to determine  
835 which transitions were balanced and which were unbalanced, we followed Chang and Marshall  
836 <sup>11</sup>, and performed binomial tests of statistical significance. Assuming a system at equilibrium,  
837 with all transitions obeying detailed balance, we expect to observe some deviation from exactly  
838 reciprocal transitions and can calculate the probability of observing a given set of ratios given  
839 underlying probabilities of forward and reverse transitions. The binomial probability of  
840 observing a set of transitions with known forward and reverse probabilities is given by

$$841 \quad P(X = f) = \binom{n}{f} p_{forward}^f p_{reverse}^{n-f}$$

842 where  $\binom{n}{f} = \frac{n!}{f!(n-f)!}$  is the choose function,  $f$  is the number of forward transitions,  $n$  is the total  
843 number of transitions (such that  $n-f$  is the number of reverse transitions), and the probabilities  
844  $p_{forward}$  and  $p_{reverse}$  are the forward and reverse probabilities. Considering only the set of  
845 transitions involving a specific pair of states, and calculating the probability that a transition  
846 between those states is either in the forward or reverse direction, the values of forward and  
847 reverse probabilities in the balanced case must be equal such that  $p_{forward} = p_{reverse} = 0.5$ .  
848 With an  $\alpha$  level of 0.05, we then considered reciprocal transition pairs with binomial  
849 probabilities less than 0.05 to be significantly unbalanced. Figure S9 displays the binomial  
850 probabilities associated with all transitions.

851 In order to calculate the estimated entropy production rate, we followed Wan and  
852 Goldstein <sup>12</sup>, where the entropy production rate is defined as

$$853 \quad \dot{S} = \frac{1}{2} \sum_{i \neq j} J_{ij} A_{ij}$$

854

855 with conjugate fluxes  $J_{ij} = p_i k_{ij} - p_j k_{ji}$  and forces  $A_{ij} = \ln \left( \frac{p_i k_{ij}}{p_j k_{ji}} \right)$  where the  $p_l$  are the  
856 probabilities of being in state  $l$  at steady state and the  $k_{ij}$  are the transition rates between states  $i$   
857 and  $j$ . We estimate the state occupancy probabilities  $p_l$  as  $\frac{T_l}{T_{Total}}$ , where  $T_l$  is the amount of time  
858 spent in state  $l$  over all trajectories and  $T_{Total}$  is the total recorded time, and the rates  $k_{ij}$  as  $\frac{N_{ij}}{T_i}$ ,  
859 where  $N_{ij}$  is the total number of observed transitions from state  $i$  to state  $j$  and  $T_i$  is the total time  
860 spent in state  $i$ . To avoid  $k_{ji} = 0$ , we let  $k_{ji} = \frac{1}{p_j T_{max}}$  where  $T_{max} = 11.55$  seconds is the  
861 maximum duration of any single recorded walking trajectory.

862 In the course of our state transition analysis, we also checked whether the waiting times  
863 between instances of each state might be non-exponentially distributed, with exponential  
864 distributions indicative of an embedded Markov process or possibly self-organized criticality  
865 <sup>13,14</sup>. Using the Lilliefors test implemented in Matlab, we found that in general, waiting times  
866 were not exponentially distributed, although states 2, 3, 6, 16, 17, 18, 25, 27, 28, 32 were found  
867 to have waiting times consistent with exponential distributions with Benjamini-Hochburg  
868 corrected p-values of 0.046, 0.046, 0.022, 0.008, 0.046, 0.017, 0.046, 0.0081, 0.0046, 0.0046  
869 respectively. Interestingly, none of the waiting times between the movements of individual cirri  
870 were found to be consistent with exponential distributions. These results are consistent with  
871 mechanisms constraining the temporal dynamics of cirri and state transitions.

872 In order to begin evaluating whether state transitions obeyed the Markov property, where  
873 the transition probabilities from one state to the next are completely determined by current state  
874 <sup>15,16</sup>, we estimated the transition matrix for walking dynamics, consisting of the transition  
875 probabilities between all states. We estimate the transition probability from state  $i$  to state  $j$  as

876  $p_{ij} = \frac{N_{ij}}{\sum_k N_{ik}}$  such that  $\sum_i p_{ij} = 1$ . The entries of the transition matrix,  $P$ , are these transition  
877 probabilities with indices  $i$  for rows and  $j$  for columns. If gait state transitions obeyed the Markov  
878 property, we expect that the product of the transition matrix with itself,  $P^2$ , would be equivalent  
879 to the two-step transition matrix where transition probabilities are computed as before except that  
880 state  $j$  is the state to which  $i$  has transitioned after an intervening transition. Figure S5 displays  
881 the results of this analysis showing that the two matrices show substantial quantitative and  
882 qualitative differences. Although these results strongly suggest violation of the Markov property,  
883 we applied the Billingsley test for a more statistically rigorous evaluation<sup>17,18</sup>. This test was  
884 implemented and performed in Matlab (release 2019b). The Billingsley test gives a  $\chi^2$  metric  
885 with  $M^2 - 2M$  degrees of freedom given by

$$886 \sum_{i=1}^M \sum_{j=1}^M \frac{(N_{ij} - R_{ij} \sum_{l=1}^M N_{il})^2}{R_{ij} \sum_{l=1}^M N_{il}},$$

887 where  $R_{ij}$ , the independent trials probability matrix, is given by

$$888 R_{ij} = \sum_{k=1}^M N_{kj} / (\sum_{h=1}^M \sum_{l=1}^M N_{hl} - \sum_{k=1}^M N_{ik}).$$

889 Importantly, we also noted that the key qualitative results of our state transition analysis  
890 are robust to the details of clustering results. In particular, we find that strongly unbalanced  
891 transitions and violation of the Markov property exist for a range of clustering parameters.  
892 Figure S8 displays the transition matrices for different clustering results.

893

### 894 ***Confocal microscopy***

895 Cells were prepared for imaging and placed into a FluoroDish as described in the Live Cell  
896 Brightfield Microscopy section. Cells were then labeled with SiR-tubulin (Spirochrome provided  
897 by Cytoskeleton, Inc, CY-SC002) at 1  $\mu$ M concentration. Cells were imaged using a Zeiss LSM

898 880 AxioExaminer and a 40x, 1.2 NA C-Apochromat water immersion objective (Zeiss) and  
899 excitation provided by a 633 nm laser (Zeiss). Only one full confocal z-stack of a complete cell  
900 was obtained during imaging to avoid effects of photodamage.

901

### 902 ***Fiber reconstruction and analysis***

903 The image stack resulting from confocal imaging was first aligned in FIJI using the  
904 StackReg plugin <sup>2</sup>. Next, fibers were manually segmented in each of the aligned z-stack images  
905 using the TrakEM2 plugin in FIJI <sup>19,20</sup>. Thick and thin fibers (Fig. 5a) were morphologically  
906 distinguished, with thick fibers having a diameter of no less than 5  $\mu\text{m}$  at the thinnest point.  
907 Fibers were traced from their distal termini to their convergences at the base of the cirri with  
908 which they were associated. Following segmentation, 3D surfaces were reconstructed in  
909 TrakEM2. Inter-fiber contacts were then found by inspection of 3D reconstructions and verified  
910 by examining individual z-stack frames to confirm intersections between fibers.

911

### 912 **References**

- 913 1. King, N., Young, S. L., Abedin, M., Carr, M. & Leadbeater, B. S. C. Starting and  
914 maintaining *Monosiga brevicollis* cultures. *Cold Spring Harb. Protoc.* **4**, (2009).
- 915 2. Schindelin, J. *et al.* Fiji: an open-source platform for biological-image analysis. *Nat.*  
916 *Methods* **9**, 676–682 (2012).
- 917 3. Ricci, N., Giannetti, R. & Miceli, C. The ethogram of *Euplotes crassus* (ciliata,  
918 hypotrichida): I. The wild type. *Eur. J. Protistol.* **23**, 129–140 (1988).
- 919 4. Tinevez, J. Y. *et al.* TrackMate: An open and extensible platform for single-particle  
920 tracking. *Methods* **115**, 80–90 (2017).

- 921 5. Kanagal, B. & Sindhvani, V. Rank Selection in Low-rank Matrix Approximations: A  
922 Study of Cross-Validation for NMFs. in *Advances in Neural Information Processing*  
923 *Systems* **23**, (2010).
- 924 6. Owen, A. B. & Perry, P. O. Bi-Cross-Validation of the SVD and the Nonnegative Matrix  
925 Factorization. *Source Ann. Appl. Stat.* **3**, 564–594 (2009).
- 926 7. Wold, S. Cross-Validatory Estimation of the Number of Components in Factor and  
927 Principal Components Models. *Technometrics* **20**, 397–405 (1978).
- 928 8. Ester, M., Kriegel, H.-P., Sander, J. & Xu, X. *A Density-Based Algorithm for Discovering*  
929 *Clusters in Large Spatial Databases with Noise*. (1996).
- 930 9. Ronan, T., Qi, Z. & Naegle, K. M. Avoiding common pitfalls when clustering biological  
931 data. *Science Signaling* **9**, re6–re6 (2016).
- 932 10. Kawamoto, T. & Kabashima, Y. Cross-validation estimate of the number of clusters in a  
933 network. *Sci. Rep.* **7**, 1–17 (2017).
- 934 11. Chang, A. Y. & Marshall, W. F. Dynamics of living cells in a cytomorphological state  
935 space. *Proc. Natl. Acad. Sci. U. S. A.* **116**, 21556–21562 (2019).
- 936 12. Wan, K. Y. & Goldstein, R. E. Time Irreversibility and Criticality in the Motility of a  
937 Flagellate Microorganism. *Phys. Rev. Lett.* **121**, 58103 (2018).
- 938 13. Bak, P., Tang, C. & Wiesenfeld, K. Self-organized criticality: An explanation of the 1/f  
939 noise. *Phys. Rev. Lett.* **59**, 381–384 (1987).
- 940 14. Sánchez, R., Newman, D. E. & Carreras, B. A. Waiting-Time Statistics of Self-Organized-  
941 Criticality Systems. *Phys. Rev. Lett.* **88**, 4 (2002).
- 942 15. Markov, A. A. Extension of the Limit Theorems of Probability Theory to a Sum of  
943 Variables Connected in a Chain. *Notes Imp. Acad. Sci. St. Petersburg. VIII Ser. Physio-*

- 944 *Mathematical Coll.* **22**, (1907).
- 945 16. Gagniuc, P. *Markov Chains: From Theory to Implementation and Experimentation*.  
946 (Wiley, 2017).
- 947 17. Billingsley, P. *Statistical Methods in Markov Chains. The Annals of Mathematical*  
948 *Statistics* **32**, 12–40 (Institute of Mathematical Statistics, 1961).
- 949 18. Hiscott, R. N. *Chi-Square Tests for Markov Chain Analysis. Mathematical Geology* **13**,  
950 (1981).
- 951 19. Cardona, A. *et al.* TrakEM2 Software for Neural Circuit Reconstruction. *PLoS One* **7**,  
952 e38011 (2012).
- 953 20. Thévenaz, P., Ruttimann, U. E. & Unser, M. A pyramid approach to subpixel registration  
954 based on intensity. *IEEE Trans. Image Process.* **7**, 27–41 (1998).

955

## 956 **Acknowledgements**

957 We would like to thank the students and faculty of the 2016 Marine Biological Laboratory  
958 Physiology Course and current and former members of the Marshall Lab and King Lab for  
959 comments, critiques, and encouragement during the development of this project. We would also  
960 like to thank David Booth and Dennis Bray for comments on the manuscript. This work was  
961 supported in part by the I2CELL Seed Award of the Fourmentin-Guilbert Scientific Foundation  
962 (to WFM), NIH grant R35 GM130327 (to WFM), NSF grant MCB- 2012647 (to WFM),  
963 and the Merck Fellowship of the Jane Coffin Childs Memorial Fund for Medical Research (to  
964 BTL).

965

## 966 **Author contributions**

967 BTL, JDP, and WFM conceived of the study and developed analyses. BTL collected data. BTL,  
968 JG, JDP, and WFM interpreted the data. BTL and JG performed analyses. BTL and WFM wrote  
969 the paper.

970

971 **Competing interests**

972 The authors declare no competing interests.

973

974 **Supplementary Information** is available for this paper including Figures S1-S9 and Movies S1  
975 and S2.
